# Supplementary material for: Effect of a dementia education intervention on the confidence and attitudes of general practitioners in Australia: a pretest post-test study
Source: PubMed Central journal article supplement — BMJ Open. 2020 Jan 26;10(1):e033218. doi: 10.1136/bmjopen-2019-033218 (PMC7044934; doi:10.1136/bmjopen-2019-033218), 2020-01-26
Supplement: bmjopen-2019-033218.draft_revisions.pdf [file bmjopen-2019-033218.draft_revisions.pdf]

# BMJ Open

BMJ Open is committed to open peer review. As part of this commitment we make the peer review history of every article we publish publicly available.

When an article is published we post the peer reviewers' comments and the authors' responses online. We also post the versions of the paper that were used during peer review. These are the versions that the peer review comments apply to.

The versions of the paper that follow are the versions that were submitted during the peer review process. They are not the versions of record or the final published versions. They should not be cited or distributed as the published version of this manuscript.

BMJ Open is an open access journal and the full, final, typeset and author-corrected version of record of the manuscript is available on our site with no access controls, subscription charges or pay-per-view fees (<http://bmjopen.bmj.com>).

If you have any questions on BMJ Open's open peer review process please email [info.bmjopen@bmj.com](mailto:info.bmjopen@bmj.com)

# BMJ Open

## The effect of a Dementia Education Intervention on the confidence and attitudes of General Practitioners in Australia

|                               |                                                                                                                                                                                                                                                                                                                                                                                                                                                                                 |
|-------------------------------|---------------------------------------------------------------------------------------------------------------------------------------------------------------------------------------------------------------------------------------------------------------------------------------------------------------------------------------------------------------------------------------------------------------------------------------------------------------------------------|
| Journal:                      | <i>BMJ Open</i>                                                                                                                                                                                                                                                                                                                                                                                                                                                                 |
| Manuscript ID                 | bmjopen-2019-033218                                                                                                                                                                                                                                                                                                                                                                                                                                                             |
| Article Type:                 | Research                                                                                                                                                                                                                                                                                                                                                                                                                                                                        |
| Date Submitted by the Author: | 27-Jul-2019                                                                                                                                                                                                                                                                                                                                                                                                                                                                     |
| Complete List of Authors:     | Mason, Ron; University of Tasmania, Wicking Dementia Research and Education Centre<br>Doherty, Kathleen ; University of Tasmania, Faculty of Health<br>Eccleston, Claire; University of Tasmania, Wicking Dementia Research and Education Centre<br>Winbolt, Margaret ; La Trobe University<br>Long, Marita; University of Tasmania, Wicking Dementia Research and Education Centre<br>Robinson, Andrew; University of Tasmania, Wicking Dementia research and Education Centre |
| Keywords:                     | medical education, confidence and attitudes, dementia diagnosis, general practitioners                                                                                                                                                                                                                                                                                                                                                                                          |
|                               |                                                                                                                                                                                                                                                                                                                                                                                                                                                                                 |

SCHOLARONE™  
Manuscripts

1  
2  
3 1 **Title: The effect of a Dementia Education Intervention on the confidence and attitudes of**  
4  
5  
6 2 **General Practitioners in Australia.**

7  
8  
9 3 **Authors**

10  
11  
12 4 Ron Mason (Ron.Mason@utas.edu.au)

13  
14  
15 5 Kathleen Doherty (Kathleen.Doherty@utas.edu.au)

16  
17  
18 6 Claire Eccleston (Claire.Eccleston@utas.edu.au)

19  
20  
21 7 Margaret Winbolt (Margaret.Winbolt@latrobe.edu.au)

22  
23  
24 8 Marita Long (Marita.Long@utas.edu.au)

25  
26  
27 9 Andrew Robinson (Andrew Robinson@utas.edu.au)

28  
29  
30 10 Correspondence to: Ron Mason, Wicking Dementia Research and Education Centre,  
31  
32  
33 11 University of Tasmania, Private Bag 143, Hobart, TAS 7001

34  
35  
36 12

1  
2  
3 1 Abstract  
4  
5

6 2 *Objectives:* This study assessed the impact of a Dementia Education Workshop on the  
7  
8  
9 3 confidence and attitudes of GP Registrars (GPR) and GP Supervisors (GPS) in relation to the  
10  
11 4 early diagnosis and management of dementia.  
12  
13

14 5 *Design:* Pre-test post-test research design.  
15  
16

17 6 *Setting:* Continuing medical education in Australia.  
18  
19

20 7 *Participants:* 332 GP Registrars and 114 GP Supervisors.  
21  
22

23 8 *Interventions:* Registrars participated in a three hour face to face workshop while  
24  
25  
26 9 Supervisors participated in a 2 hour modified version designed to assist with the education  
27  
28  
29 10 and supervision of registrars.  
30

31 11 *Main outcome measures:* The General Practitioners Confidence and Attitude scale for  
32  
33  
34 12 Dementia (GPACS-D) was used to assess overall confidence, attitude to care and  
35  
36  
37 13 engagement. A Wilcoxon signed ranks test was used to identify potential differences from  
38  
39 14 pre-workshop (T1) to post workshop (T2) for each GP group. A Mann Whitney U test was  
40  
41  
42 15 undertaken to ascertain differences between each workshop group. A Cohen's d was  
43  
44 16 calculated to measure the effect size of any observed difference between T1 and T2 scores.  
45  
46

47 17 *Results:* Significant increases in scores were recorded for '*Confidence in Clinical Abilities*',  
48  
49  
50 18 '*Attitude to Care*' and '*Engagement*' between pre and post-test periods. GP Registrars  
51  
52 19 exhibited the greatest increase in scores for *Confidence in Clinical Abilities* and *Engagement*.  
53

54  
55 20 *Conclusions:* Targeted educational interventions can improve attitude, increase confidence  
56  
57  
58 21 and reduce negative attitudes towards engagement of participating GPs.  
59  
60

1  
2  
3 1 *Article Summary*  
4  
5

6 2 Strengths and limitations of this study  
7  
8

- 9  
10 3 • The sample of Registrars and Supervisors is representative of the broader GP  
11  
12 4 population in Australia[1].  
13  
14 5 • While the workshop for GP Registrars was compulsory this was not the case for GP  
15  
16 6 Supervisors, thus a self-selection bias is possible.  
17  
18 7 • Confidence, Attitudes and Engagement were measured via GPACS-D, a validated  
19  
20 8 tool.  
21  
22 9 • While each of the subscales included items relating to early diagnosis, the survey did  
23  
24 10 not fully capture attitudes towards disclosure or perceived self-efficacy with regard  
25  
26 11 to communication.  
27  
28  
29  
30  
31  
32  
33  
34  
35  
36  
37  
38  
39  
40  
41  
42  
43  
44  
45  
46  
47  
48  
49  
50  
51  
52  
53  
54  
55  
56  
57  
58  
59  
60

## 1 Introduction

2  
3  
4  
5  
6  
7  
8  
9  
10  
11  
12  
13  
14  
15  
16  
17  
18  
19  
20  
21  
22  
23  
24  
25  
26  
27  
28  
29  
30  
31  
32  
33  
34  
35  
36  
37  
38  
39  
40  
41  
42  
43  
44  
45  
46  
47  
48  
49  
50  
51  
52  
53  
54  
55  
56  
57  
58  
59  
60

2 General Practitioners (GPs) are central to the early diagnosis and management of dementia [2]. Early diagnosis provides the opportunity for patients, carers and family to be informed about the condition, its prognosis, treatment options and support [3, 4] and allows the patient to plan for their future and be active participants in decision-making [5, 6].

6 Obstacles to timely diagnosis and intervention may include a lack of diagnostic tests/certainty [7] and lack of confidence in diagnostic skills and management [8], while negative attitudes towards diagnosis, disclosure and treatment [9-11] may also affect diagnosis rates. Further, stigma may delay recognition and diagnosis through concealment, minimisation or dismissal of early signs and symptoms [12]. Patients often present with co-occurrent conditions, further complicating the clinical picture [4, 13].

12 It is estimated that one third of GP's lack confidence in their diagnostic skills, while two thirds lack confidence in the management of behaviours associated with dementia [8], or feel they have little or nothing to offer patients presenting with dementia [14], with a third of GPs failing to routinely disclose the diagnosis [8, 15, 16]. Relatedly, pessimism surrounding dementia prognosis, and inability to offer curative treatment [17] may lead to an attitude of 'therapeutic nihilism' among GPs [8, 12], which reflects a biomedical definition of treatment and an ethos centred around curing people [17], while simultaneously ignoring therapeutic interventions that may benefit people with dementia and their carers [18-20].

21 Illiffe (2003) argues that low rates of dementia diagnosis are not only a result of knowledge and skills deficits but also failure to transfer acquired knowledge into clinical practice [10].

23 Relatedly, Boise et al. (2005) states that attitude rather than knowledge is a key determinant

1  
2  
3 1 of whether a GP undertakes a full assessment [3], and others argue that the diagnostic and  
4  
5 2 management practices of GPs towards dementia may be significantly affected by underlying  
6  
7  
8 3 beliefs and attitudes [21, 22]. While social psychological theory suggests a relationship  
9  
10 4 between perceptions of self-efficacy and effort, and avoidance [23], GPs hesitancy to  
11  
12 5 diagnose dementia may not be explicit. Rather it may manifest in a reluctance to formalise a  
13  
14 6 diagnosis or preferentially treat co-occurring conditions for which treatment options are  
15  
16 7 available [11, 24], referring on because of limited treatment options [25], questioning the  
17  
18 8 (traditional) role of the GP in treating dementia [26], or having insufficient resources [16].  
19  
20  
21  
22  
23  
24  
25  
26  
27  
28  
29  
30  
31  
32  
33  
34  
35  
36  
37  
38  
39  
40  
41  
42  
43  
44  
45  
46  
47  
48  
49  
50  
51  
52  
53  
54  
55  
56  
57  
58  
59  
60

10 Changing attitudes towards the early diagnosis of dementia has been identified as a  
11 significant task for medical educators, with the key to countering such attitudes being  
12 targeted educational campaigns [27]. Moreover, evidence suggests that the focus of GP  
13 training around dementia should encompass more than knowledge acquisition and aim to  
14 improve confidence and attitude [28]. While GP attitudes toward caring for people with  
15 dementia have been shown to be positive [29], fear of misdiagnosis [7] and lack of confidence  
16 in diagnostic and dementia management skills have been reported to be of particular concern  
17 in multiple studies with a lack of effective education and training frequently cited as an  
18 underlying cause [8, 22, 30].

19 Comprehensive dementia education for GPs should include epidemiological knowledge,  
20 communicating a diagnosis, symptom management, and support services for patients and  
21 their carers [31, 32]. Tullo (2011) emphasises the importance of personhood, quality of life  
22 and communication with patients [33], while Phillipson (2015) argues that training  
23 interventions should place an emphasis on the slow progression of the condition, the  
24 treatments available, and maintenance of quality of life [34].

1  
2  
3 1  
4  
5  
6 2 In Australia GPs typically are trained in an apprenticeship model with a key aspect of  
7  
8 3 training involving experienced GPs (Supervisors) providing support to the GP registrar (GPR)  
9  
10 4 within a general practice setting. Supervisors facilitate registrar learning through identifying  
11  
12 5 learning needs, encouraging reflective learning and practice, guiding access to resources,  
13  
14 6 providing advice on applying knowledge to specific patient cases and role modelling  
15  
16 7 interactions with patients (22).  
17  
18  
19  
20 8 Tailored training workshops were developed specifically to augment this interaction and  
21  
22 9 address dementia specific training needs. Directed at both Supervisors and GPRs, we have  
23  
24 10 previously shown them to be effective in improving dementia knowledge [1]. Here we  
25  
26 11 examine the impact of these workshops on attitudes and confidence toward dementia with  
27  
28 12 a view to improving management of dementia in general practice.  
29  
30  
31  
32  
33 13 Methods  
34  
35  
36 14 *Study aims and design*  
37  
38  
39 15 In Australia GP Registrars are required to engage in a learning program consisting of a  
40  
41 16 number of learning units conducted by regional training providers in each state. “The  
42  
43 17 Recognising, Diagnosing and Managing Dementia in General Practice” workshop was  
44  
45 18 developed by the Wicking Dementia Research and Education Centre as a response to the  
46  
47 19 expressed absence of appropriate dementia related content in GP Registrar training  
48  
49 20 programs. The workshop consists of two 1.5-hour face to face presentations delivered by  
50  
51 21 medical educators focusing on (a) recognising and diagnosing dementia and (b) managing  
52  
53 22 dementia in General Practice, while the Supervisor’s workshop is a modified version of that  
54  
55 23 delivered to Registrars that seeks to support Supervisors to teach registrars the diagnosis  
56  
57  
58  
59  
60



1 and management content provided in the registrar program as discussed elsewhere[1]. The  
2 strong focus on providing a framework for decision making for the recognition, diagnosis  
3 and management of dementia is complemented by tools and resources that are aimed at  
4 improving both diagnostic capacity and providing ongoing care and support for people with  
5 dementia and their family and/or carers. There is a stronger focus on the lived experience of  
6 dementia and more in-depth coverage of some aspects of dementia diagnosis and management in  
7 the Registrar's workshop than in the Supervisors workshop.

### 8 9 *Participants*

10 GPs were recruited from dementia education workshops conducted in 4 Australian States  
11 between 2014 and 2017. The sample comprised 2 cohorts; those who undertook the GP  
12 Registrars Workshop (n=332) and those who undertook the Supervisors Workshop (n=114).

### 13 *Process and measures*

14 All workshop participants were invited to complete the GPACS-D survey [38] immediately  
15 before (T1) and immediately after (T2) the workshop. Participants were provided with an  
16 information sheet about the research, were informed that the survey was entirely voluntary  
17 and that completion of the survey implied consent. The impact of the workshops on  
18 confidence and attitude was measured using the GPACS-D which comprises 3 subscales;  
19 *Confidence in Clinical Abilities* (6 items), *Attitude to Care* (6 items) and *Engagement* (3 items)  
20 and validated using confirmatory factor analysis [35]. A Likert scale was employed scoring  
21 from 1 (strongly agree) to 5 (strongly disagree). Total subscale scores were standardised  
22 with a minimum score of 1 and a maximum score of 5 so that comparisons could be made  
23 between subscales [36].

## 1 *Analysis*

2 We were interested in the impact of the respective workshops on GP Registrars (GPRs) and  
3 GP Supervisors. We hypothesised that the Supervisor group would differ from the GPR  
4 group in attitude and confidence given their experience as practicing GPs.

5 Non-parametric tests were employed to identify differences between groups (Mann  
6 Whitney U test for independent samples) and between time points for each group  
7 (Wilcoxon signed ranks test for paired samples). Cohen's d was calculated to measure the  
8 effect size of any observed difference between T1 and T2 scores for each group with  $d=0.2$   
9 equivalent to a 'small' effect size, 0.5 a 'medium' effect size and 0.8 a 'large' effect size [37].  
10 All data analyses were conducted using SPSS (Version 22).

## 11 *Ethics approval*

12 A University Human Research Ethics Committee reviewed and approved this study  
13 (Reference Number: H0012046). Before the workshop commenced, the study was described  
14 to participants and all participants were given an Information Sheet. Return of the  
15 completed surveys at the end of the workshop implied their consent for use of the data.

## 16 *Patient and Public involvement*

17 There was no patient or public involvement in this study.

## 18 *Results*

19 446 respondents were included in the analysis comprising 332 attendees at GP Registrar  
20 workshops (the GPR group) and 114 attendees from the Supervisor workshop (the  
21 Supervisor group) (Table 1). Supervisors were significantly older than GPRs ( $U=2542$ ;  
22  $z=13.065$ ;  $p<.000$ ), and more had undertaken prior dementia education ( $\chi^2=20.263$ ;  $p<.000$ ),

1 although this proportion was small for both groups. More Supervisors had provided  
 2 professional care to someone with dementia than GPRs ( $\chi^2=11.294$ ;  $p=.001$ ), while similar  
 3 proportions of both groups had a family member with dementia.

4  
 5 *Table 1: Sample Characteristics*

| Demographics               | GP Registrars<br>(n=332) | Supervisors<br>(n=114) |
|----------------------------|--------------------------|------------------------|
| Age                        | 33.03 (sd=6.1)           | 49.8 (sd=10.5)         |
| Male                       | 40.2% (n=129)            | 50% (n=56)             |
| Australian born            | 41.9% (n=139)            | 39.5% (n=45)           |
| Previous dementia training | 5.6% (n=18)              | 20% (n=22)             |
| Provided professional care | 87% (n=280)              | 98% (n=108)            |
| Family member dementia     | 35.5% (n=114)            | 38.2 (n=42)            |

6  
 7 The GPACS-D assessed the impact of each of the workshops on three constructs;

8 *Confidence in Clinical Abilities, Attitude to Care and Engagement.*

9 Items in the *Confidence in clinical abilities* subscale reflect a GP's perceptions of their  
 10 capacity to diagnose, treat and manage dementia. Analysis of scores for each of the items  
 11 comprising this subscale is shown in Table 2.

12 *Table 2: Confidence in Clinical Abilities. Pre and Post Workshop scores by Role.*

| Confidence in Clinical Abilities                                           | Role | Pre-test<br>mean<br>score( $\pm$ sd) | Post-test<br>mean<br>score( $\pm$ sd) | Z     | P*     | Cohen's D |
|----------------------------------------------------------------------------|------|--------------------------------------|---------------------------------------|-------|--------|-----------|
| Overall Score                                                              | GPR  | 2.67(0.62)                           | 3.69(0.57)                            | 15.04 | <.000* | 1.710     |
|                                                                            | GPS  | 3.28(0.75)+                          | 4.03(0.53)+                           | 8.17  | <.000* | 1.150     |
| Frustration at not being able to<br>effectively treat people with dementia | GPR  | 2.49(0.93)                           | 3.55(0.87)                            | 12.24 | <.000* | 1.177     |
|                                                                            | GPS  | 2.94(1.13)                           | 3.94(0.84)+                           | 6.96  | <.000* | 1.004     |
| Confident in ability to discuss legalities                                 | GPR  | 2.32(0.94)                           | 3.25(0.88)                            | 12.28 | <.000* | 1.021     |
|                                                                            | GPS  | 2.96(1.08)+                          | 3.60(0.92)+                           | 4.97  | <.000* | 0.637     |
| Confidence in ability to diagnose                                          | GPR  | 2.65(0.82)                           | 3.82(0.71)                            | 13.87 | <.000* | 1.525     |
|                                                                            | GPS  | 3.31(0.88)+                          | 4.18(0.61)+                           | 7.48  | <.000* | 1.149     |
| Confident in ability to provide medical                                    | GPR  | 2.86(0.78)                           | 3.80(0.69)                            | 13.24 | <.000* | 1.276     |

|                                                       |     |             |              |       |        |       |
|-------------------------------------------------------|-----|-------------|--------------|-------|--------|-------|
| care                                                  | GPS | 3.52(0.88)+ | 4.21(0.56)+  | 6.67  | <.000* | 0.935 |
| Confident in ability to provide advice about symptoms | GPR | 2.70(0.78)  | 3.70(0.71)   | 13.41 | <.000* | 1.340 |
|                                                       | GPS | 3.23(0.87)+ | 3.95(0.71)+  | 6.52  | <.000* | 0.906 |
| Confident in knowledge of local resources             | GPR | 2.43(0.84)  | 3.47(0.89)   | 13.03 | <.000* | 1.201 |
|                                                       | GPS | 3.04(0.92)+ | 3.79 (0.83)+ | 6.88  | <.000* | 0.856 |

1 GPR, n=332; GPS (Supervisor), n=114.

2 +Indicates a significant difference between groups at the .05 level of significance (Mann Whitney U test for independent  
3 samples).

4 \* Indicates a significant difference between pre and post intervention periods at the .05 level of significance (Wilcoxon  
5 signed ranks test for paired samples).

6 While both GPRs and Supervisors were significantly more confident after the workshops),  
7 Supervisors were significantly more confident in their clinical abilities than GPRs both before  
8 (U=9462; z=7.707; p<.000) and after their respective workshops (U=10962; z=5.327; p<.000),  
9 GPRs exhibited a significantly greater improvement in score than Supervisors (U=12051;  
10 z=4.014; p<.000), while the effect size of the change in *Confidence in clinical abilities* was  
11 strong for both groups and greatest for GPRs .Supervisors recorded a higher level of  
12 confidence than GPRs on all items both before and after the workshop, although both  
13 groups improved significantly across all items (Table 2). GPRs exhibited larger score changes  
14 on all items after the workshop.

15 Supervisors reported a higher score for 'confidence in ability to diagnose dementia' after  
16 the workshop (u=12477; z=4.643; p<.000) than GPRs. However, only 13.8% of GPRs were  
17 confident in their diagnostic ability before the workshop compared to 44.2% of Supervisors,  
18 rising to 60.4% GPRs post workshop compared to 62.6% post for Supervisors.

19 Confidence in 'ability to provide appropriate medical care' also increased significantly for  
20 both groups, with Supervisors recording a higher mean score both before and after the  
21 workshop (U=11599; z=5.455; p<.000), while a strong effect size was observed for score  
22 changes in both groups (GPR, d=1.276; Supervisors, d=.935). An increase in the proportion  
23 of GPRs agreeing with the statement (18.7% to 59.8%) was observed after the workshop.

1 Confidence in 'providing advice about managing dementia related symptoms' improved  
 2 markedly for both groups, with Supervisors recording a significantly higher score than GPRs  
 3 (U=13804; z=3.182; p<.001). Only 13.8% of GPRs were confident pre-workshop increasing to  
 4 56.3% post workshop, with 9.5% strongly agreeing. Before the workshop 48.5% of  
 5 Supervisors agreed that they were confident in providing advice (8.8% strongly agreed),  
 6 increasing to 67% after the workshop (27.4% strongly agreed).

### 7 Attitude to Care

8 Items in the *Attitude to Care* subscale reflect aspects of the provision of care for patients  
 9 and their families. Analysis of scores for each of the items comprising this subscale is shown  
 10 in Table 3.

11 Table 3: *Attitude to Care. Pre and Post Workshop Scores by Role*

| Attitude to Care                                                  | Role | Pre-test mean score(±sd) | Post-test mean score(±sd) | z     | P**    | Cohen's D |
|-------------------------------------------------------------------|------|--------------------------|---------------------------|-------|--------|-----------|
| Overall Score                                                     | GPR  | 4.35(0.43)               | 4.70(0.40)+               | 12.98 | <.000* | 0.840     |
|                                                                   | GPS  | 4.35(0.44)               | 4.59(0.40)                | 6.37  | <.000* | 0.570     |
| Much can be done to improve lives of patient                      | GPR  | 4.22(0.71)               | 4.54(0.61)                | 6.98  | <.000* | 0.483     |
|                                                                   | GPS  | 4.37(0.65)               | 4.61(0.54)                | 4.43  | <.000* | 0.401     |
| Early detection benefits the patient                              | GPR  | 4.32(0.74)               | 4.73(0.59)+               | 8.38  | <.000* | 0.612     |
|                                                                   | GPS  | 4.21(0.84)               | 4.52(0.73)                | 3.92  | <.000* | 0.393     |
| Important family/carers seek external support                     | GPR  | 4.56(0.58)               | 4.81(0.47)+               | 6.98  | <.000* | 0.473     |
|                                                                   | GPS  | 4.52(0.61)               | 4.67(0.53)                | 2.69  | <.000* | 0.262     |
| Important family carers contact Alzheimer's Aust.                 | GPR  | 4.38(0.67)               | 4.69(0.54)                | 7.92  | <.000* | 0.509     |
|                                                                   | GPS  | 4.42(0.69)               | 4.64(0.57)                | 4.01  | <.000* | 0.347     |
| GPs in best position to organise care                             | GPR  | 3.95(0.82)               | 4.40(0.70)                | 9.41  | <.000* | 0.59      |
|                                                                   | GPS  | 4.06(0.87)               | 4.44(0.66)                | 4.68  | <.000* | 0.492     |
| Patients should be informed early so they can plan for the future | GPR  | 4.31(0.72)               | 4.82(0.51)+               | 9.92  | <.000* | 0.817     |
|                                                                   | GPS  | 4.28(0.77)               | 4.62(0.75)                | 4.25  | <.000* | 0.447     |

12 GPR, n=332; GPS (Supervisor), n=114.

13 +Indicates a significant difference between groups at the .05 level of significance (Mann Whitney U test for independent samples).

15 \* Indicates a significant difference between pre and post intervention periods at the .05 level of significance (Wilcoxon signed ranks test for paired samples).

17 Overall mean scores for *Attitude to Care* (Table 3) were equivalent for Supervisors and GPRs  
 18 prior to the workshops and increased significantly for both GPRs and Supervisors following

1 the workshop, with moderate effect sizes for the increases (Table 3). GPRs scored  
2 significantly higher than Supervisors post workshop ( $U=13896$ ;  $z=2.578$ ;  $p=.010$ ).  
3 Significantly higher mean scores were reported for GPRs compared to Supervisors for 'early  
4 detection benefits the patient' ( $z=3.21$ ;  $p<.000$ ) and 'Patients should be informed early, so  
5 they can plan for their future' ( $z=3.26$ ;  $p<.000$ ; Table 3).

6 Both groups reported significant increases in agreement that 'early detection of dementia  
7 benefits the patient', which had a moderate effect size for GPRs and a weak effect size for  
8 Supervisors. The greatest difference reported was for those strongly agreeing. GPRs  
9 recorded an increase in those strongly agreeing (from 47.3% pre-workshop to 77.9% post  
10 workshop) compared to an 18 % increase for Supervisor's (44.2% to 62.6%) post workshop.  
11 Similar results were obtained for the item 'Patients with dementia should be informed early  
12 so they can plan for the future'. While both groups reported significant increases in those  
13 agreeing with the benefits of informing patients early, GPRs had significantly higher scores  
14 than Supervisors post workshop (4.82 versus 4.62;  $z=3.26$ ;  $p=.001$ ) and recorded a larger  
15 increase in score. A change with a strong effect size was observed for GPRs and with a  
16 moderate effect size for Supervisors.

17 Both GPR and Supervisor groups recorded increases in those agreeing that 'it is important  
18 that relatives/family/carers of dementia seek external support'. The post workshop mean  
19 score for GPRs was greater than for Supervisors ( $z=2.99$ ;  $p<.003$ ), while GPRs also exhibited  
20 the greatest improvement

21 *Engagement*

1 Engagement measures a GP's perceptions towards treating dementia, and includes fear of  
 2 communicating a diagnosis, frustration in managing dementia and a preference for treating  
 3 other conditions (Table 4).

4 Both Supervisors and GPRs recorded a significantly higher score for *Engagement* post  
 5 workshop, while Supervisors reported greater *Engagement* than GPRs at baseline (U=12055;  
 6 z=5.549; p<.000) and after the workshop (U=11338; z=5.135; p<.000). A moderate effect  
 7 size was observed for the score change shown for each group.

8 Table 4: *Engagement; Pre and Post Workshop Scores by Role*

| Engagement                             | Role | Pre-test mean score(±sd) | Post-test mean score(±sd) | Z     | P*     | Cohen's D |
|----------------------------------------|------|--------------------------|---------------------------|-------|--------|-----------|
| Overall Score                          | GPR  | 2.98(0.70)               | 3.42(0.74)                | 10.25 | <.000* | 0.610     |
|                                        | GPS  | 3.44(0.76)+              | 3.84(0.74)+               | 6.16  | <.000* | 0.530     |
| Managing dementia frustrating          | GPR  | 3.00(.85)                | 3.51(0.94)                | 8.24  | <.000* | 0.569     |
|                                        | GPS  | 3.45(1.02)+              | 3.91(0.83)+               | 4.36  | <.000* | 0.494     |
| Fear of communicating a diagnosis      | GPR  | 3.88(0.98)               | 4.14(0.89)                | 4.78  | <.000* | 0.277     |
|                                        | GPS  | 4.16(0.97)+              | 4.53*(0.73)               | 3.43  | <.000* | 0.431     |
| Preference for treating other diseases | GPR  | 2.77(0.96)               | 3.20(0.99)                | 7.83  | <.000* | 0.440     |
|                                        | GPS  | 3.27(0.97)+              | 3.64(0.95)+               | 4.47  | <.000* | 0.355     |

9 GPR, n=332; GPS (Supervisor), n=114.

10 +Indicates a significant difference between groups at the .05 level of significance (Mann Whitney U test for independent samples).

11 \* Indicates a significant difference between pre and post intervention periods at the .05 level of significance (Wilcoxon signed ranks test for paired samples).

12 Supervisors recorded significantly higher mean scores for each of the 3 items comprising  
 13 engagement at both pre and post workshop periods.

14 Both GPR and Supervisor groups reported less frustration managing dementia post  
 15 workshop, while Supervisors exhibited significantly less frustration at both pre and post  
 16 workshop periods (u=12909; z=3.910; p>.000) than GPRs. The greatest improvement was  
 17 reported by GPRs, with moderate effect sizes exhibited for both groups. The proportion  
 18 disagreeing with the statement that 'dementia was frustrating to manage' increased from  
 19  
 20

1  
2  
3 1 19.5% to 39.4% for the GPR group which was similar magnitude of change to Supervisors  
4  
5  
6 2 (31% to 50.5%). However, a significant proportion of both groups were still undecided about  
7  
8 3 this statement post workshop (GPRs 33.1%,19.6% Supervisors). As with other aspects of the  
9  
10 4 subscale, Supervisors reported less fear of communicating a diagnosis than GPRs at both pre  
11  
12  
13 5 and post workshop periods ( $u=12465$ ;  $z=4.458$ ;  $p<.000$ ) with a moderate effect for  
14  
15 6 Supervisors and a weak effect for GPRs.

17  
18 7 Similar results were obtained for a preference to treat other diseases, with both groups  
19  
20  
21 8 recording significant improvement after the workshop. Supervisors recorded a higher mean  
22  
23 9 score than GPRs at both pre and post workshop periods ( $u=12868$ ;  $z=3.906$ ;  $p<.000$ ), while  
24  
25 10 GPRs exhibited the greatest increase, with moderate effect observed for both groups. The  
26  
27  
28 11 proportion of GPRs agreeing to a preference for treating other diseases decreased from 32%  
29  
30 12 pre-workshop to 18.6% post workshop, compared to 18.6% to 10.3% for Supervisors.  
31  
32  
33 13 However, a large proportion of each group were neutral to the statement before and after  
34  
35 14 the workshop, with a decreased proportion of Supervisors (42.5% pre, 32.7% post) and a  
36  
37  
38 15 relatively unchanged proportion of GPRs (38.1% pre, 39% post) reporting neutral views on  
39  
40 16 this item.

## 41 42 43 44 17 Discussion

45  
46  
47 18 This study examined the impact of tailored dementia education workshops on the attitudes  
48  
49 19 and confidence of both GP Registrars and GP Supervisors towards dementia.

50  
51  
52 20 Attending tailored workshops resulted in significant improvements in attitudes, confidence  
53  
54 21 and engagement of both groups. While increased confidence and reduced negative  
55  
56  
57 22 attitudes towards the management of dementia have previously been reported to correlate  
58  
59  
60



1  
2  
3 1 with a self-reported history of prior dementia training [18], unlike others this study  
4  
5  
6 2 demonstrates a direct and immediate impact of a training intervention.  
7

8  
9 3 In some respects the predisposing positive *Attitude to Care* and improvement post  
10  
11 4 workshop was not surprising given that GPs are reported to have a positive attitude with  
12  
13 5 respect to their role in providing care and early diagnosis for people with dementia [29, 38].

14  
15  
16 6 Indeed, our findings highlight the effectiveness of the workshop's focus on early warning  
17  
18 7 signs, and the importance of diagnosis and management approaches, which are intended to  
19  
20 8 influence participants to more effectively engage people with dementia and their families.

21  
22  
23 9 These results suggest that workshop attendance is useful in preparing GP registrars for  
24  
25  
26 10 practice and experienced GPs who act as their Supervisors.

27  
28  
29 11 The confidence of the GP registrar group, while not as high as Supervisors, significantly  
30  
31 12 improved post workshop, albeit from a notably low level which provides insight into the  
32  
33 13 implications of the traditional bio-medical focus of much medical education[17], often with  
34  
35 14 minimal focus on therapeutic interventions [18-20]. Differences in pre-test confidence  
36  
37 15 between the cohorts are not surprising given GPR's are generally younger and less  
38  
39 16 experienced [22]. The greater magnitude of change for GP Registrars in this study would  
40  
41 17 suggest that elements of the workshop, especially diagnostic skills, providing appropriate  
42  
43 18 medical care and managing dementia related symptoms, may particularly impact on  
44  
45 19 confidence, again highlighting its applicability to GP specialty training.

46  
47  
48  
49  
50  
51 20 However, it is interesting that only 44% of Supervisors reported confidence to diagnose  
52  
53 21 dementia pre workshop, rising to only around 60% post workshop. Similar findings were  
54  
55 22 evident in the items related to confidence providing advice and appropriate medical care. It  
56  
57 23 was also notable that at both pre and post workshop periods Supervisors had more negative  
58  
59  
60

1 attitudes to the benefits of early diagnosis. This finding may be influenced by the  
2  
3 Supervisors underlying beliefs and attitudes [21, 22], which in turn may delay diagnosis in  
4  
5 practice given attitudes rather than knowledge have been identified as a key determinant of  
6  
7 whether a GP undertakes a full assessment [3]. Addressing these gaps is essential if GP  
8  
9 Supervisors are to effectively support GPRs to develop their dementia diagnostic and  
10  
11 management skills in the clinic in the context of apprenticeship model of GP training utilised  
12  
13 in Australia[39, 40].

14  
15 A positive impact on engagement was also observed with both groups recording  
16  
17 significantly improved scores after each of the workshops. The higher score for the GP  
18  
19 Supervisors group may in part reflect their level of exposure and experience to dementia.  
20  
21 However, it is concerning that pre workshop only 31% of Supervisors disagreed with the  
22  
23 statement 'dementia is frustrating to manage', with 19.5 % of GPRs disagreeing. While these  
24  
25 scores improved post workshop this does suggest a high level of frustration [36]. Indeed, the  
26  
27 literature suggests GP's perceptions of their capacity to diagnose, communicate a diagnosis  
28  
29 and manage dementia may impact on the extent to which they engage with a person with  
30  
31 suspected or actual dementia or how much effort they apply to it [36].

32  
33 Of note, GPRs commenced the workshop with a low likelihood of having experienced any  
34  
35 prior dementia training, despite 87% having provided professional care to people with  
36  
37 dementia, with a similar experience for supervisors. The lack of training certainly has  
38  
39 implications for the GPs' knowledge of dementia, as we have previously demonstrated [1].

40  
41 Results reported recently suggest that particularly for GPRs, the workshop increases their  
42  
43 base knowledge of dementia [1] together with their confidence levels as demonstrated in  
44  
45 this analysis.

1  
2  
3 1 Improved knowledge, in association with enhanced confidence and attitude suggests that  
4  
5  
6 2 tailored workshops have the potential to not only increase diagnosis rates and improve  
7  
8 3 management of dementia but also enhance in-practice training particularly where both  
9  
10 4 Registrar and Supervisor have received targeted dementia training.  
11  
12  
13  
14 5  
15  
16  
17 6 Conclusion

18  
19  
20 7 Targeted educational interventions can improve attitude, increase confidence and reduce  
21  
22 8 negative attitudes towards engagement of participating GP registrars and supervisors.  
23  
24 9 Findings highlight a clear need for GPs to have access to targeted workshops especially  
25  
26  
27 10 given the growing numbers of people with dementia.  
28  
29  
30  
31  
32  
33

#### 34 12 **Contributor Information**

35 13 Study design: MW AR; Data Collection: RM; Data analysis and interpretation: RM, KD, CE; Drafting the  
36 14 article: RM; Critical revision of the article: RM, KD, CE, MW,ML, AR; Final approval: all authors.

#### 38 15 **Guarantor Information**

40 16 Andrew Robinson

#### 42 17 **Competing Interests Declaration**

44 18

46 19 All authors have completed the ICMJE uniform disclosure form at [www.icmje.org/coi\\_disclosure.pdf](http://www.icmje.org/coi_disclosure.pdf)  
47 20 and declare: all authors had financial support from the Victorian and Tasmanian Dementia Training  
48 21 Study Centre (DTSC) until 2016 and Dementia Training Australia (DTA) from 2016 for the submitted  
49 22 work; no financial relationships with any organisations that might have an interest in the submitted  
50 23 work in the previous three years; no other relationships or activities that could appear to have  
51 24 influenced the submitted work.

#### 53 25 **Transparency Declaration**

55 26 The authors affirm that this manuscript is an honest, accurate and transparent account of the study  
56 27 being reported and that no important aspects of the study have been omitted.

#### 58 28 **Role of the Funding Source**

1 This project was funded by the Australian Government Department of Health through the Victorian  
2 and Tasmanian Dementia Training Study Centre (DTSC) until 2016 and then Dementia Training  
3 Australia (DTA) from 2016. The study design was developed by the Wicking Dementia Research and  
4 Education Centre (WDREC) and submitted to the funder (DTSC and DTA) for approval. Data collection,  
5 analysis, interpretation and reporting was undertaken by the WDREC in partnership with Dr Margaret  
6 Winbolt from La Trobe University, who was Director of the DTSC and is the Director of DTA. All authors  
7 had full access to all the data (including statistical reports and tables) in the study and can take  
8 responsibility for the integrity of the data and the accuracy of the data analysis.

### 9 **Data Sharing**

10 The data set is not available as ethics approval does not allow release.

### 11 **Acknowledgements**

12 We would like to acknowledge the significant contribution made by Dr Mandy Lo in  
13 developing the GP workshops.

### 14 **References**

- 16 1. Tierney L, Mason R, Doherty K, Winbolt M, Long M, Robinson A: **Workshops on diagnosis and management of dementia for general practitioners: a pre-post intervention study of dementia knowledge.** *BMJ open* 2019, **9**(4):e027804.
- 17 2. Geldmacher DS, Kerwin DR: **Practical diagnosis and management of dementia due to Alzheimer's disease in the primary care setting: an evidence-based approach.** *The primary care companion for CNS disorders* 2013, **15**(4).
- 18 3. Connell CM, Boise L, Stuckey JC, Holmes SB, Hudson ML: **Attitudes toward the diagnosis and disclosure of dementia among family caregivers and primary care physicians.** *The Gerontologist* 2004, **44**(4):500-507.
- 19 4. Pathak KP, Montgomery A: **General practitioners' knowledge, practices, and obstacles in the diagnosis and management of dementia.** *Aging & mental health* 2015, **19**(10):912-920.
- 20 5. Bamford C, Lamont S, Eccles M, Robinson L, May C, Bond J: **Disclosing a diagnosis of dementia: a systematic review.** *International journal of geriatric psychiatry* 2004, **19**(2):151-169.
- 21 6. Ford E, Greenslade N, Paudyal P, Bremner S, Smith HE, Banerjee S, Sadhwani S, Rooney P, Oliver S, Cassell J: **Predicting dementia from primary care records: A systematic review and meta-analysis.** *PloS one* 2018, **13**(3):e0194735.
- 22 7. Milne A: **Dementia screening and early diagnosis: The case for and against.** *Health, risk & society* 2010, **12**(1):65-76.
- 23 8. Cahill S, Clark M, O'Connell H, Lawlor B, Coen RF, Walsh C: **The attitudes and practices of general practitioners regarding dementia diagnosis in Ireland.** *International Journal of Geriatric Psychiatry* 2008, **23**:663-669.
- 24 9. Koch T, Iliffe S: **Rapid appraisal of barriers to the diagnosis and management of patients with dementia in primary care: a systematic review.** *BMC Family Practice* 2010, **11**(1):1.
- 25 10. Iliffe S, Manthorpe J, Eden A: **Sooner or later? issues in the early diagnosis of dementia in general practice: a qualitative study.** *Family Practice* 2003, **20**(4):376-381.

1  
2  
3  
4  
5  
6  
7  
8  
9  
10  
11  
12  
13  
14  
15  
16  
17  
18  
19  
20  
21  
22  
23  
24  
25  
26  
27  
28  
29  
30  
31  
32  
33  
34  
35  
36  
37  
38  
39  
40  
41  
42  
43  
44  
45  
46  
47  
48  
49  
50  
51  
52  
53  
54  
55  
56  
57  
58  
59  
60

11. van Hout H, Vernooij-Dassen M, Bakker K, Blom M, Grol R: **General practitioners on dementia: tasks, practices and obstacles.** *Patient education and counseling* 2000, **39**(2):219-225.
12. Vernooij-Dassen MJ, Moniz-Cook ED, Woods RT, Lepeleire JD, Leuschner A, Zanetti O, Rotrou Jd, Kenny G, Franco M, Peters V: **Factors affecting timely recognition and diagnosis of dementia across Europe: from awareness to stigma.** *International journal of geriatric psychiatry* 2005, **20**(4):377-386.
13. Hansen EC, Hughes C, Routley G, Robinson AL: **General Practitioners' experiences and understandings of diagnosing dementia: Factors impacting on early diagnosis.** *Social Science and Medicine* 2008, **67**(2008):1776-1783.
14. McIntosh IB, Swanson V, Power KG, Rae C: **General practitioners' and nurses' perceived roles, attitudes and stressors in the management of people with dementia.** *HEALTH BULLETIN-SCOTTISH OFFICE DEPARTMENT OF HEALTH* 1999, **57**:35-43.
15. Lahjibi-Paulet H, Alain AD, Minard A, Gaxatte C, Saint-Jean O, Somme D: **Attitudes towards Alzheimer's disease: A qualitative study of the role played by social representation on a convenient sample of French general practitioners.** *Aging Clinical and Experimental Research* 2012, **24**(4):384-390.
16. Somme D, Gautier A, Pin S, Corvol A: **General practitioner's clinical practices, difficulties and educational needs to manage Alzheimer's disease in France: analysis of national telephone-inquiry data.** *BMC family practice* 2013, **14**(1):81.
17. Gibbins J, McCoubrie R, Forbes K: **Why are newly qualified doctors unprepared to care for patients at the end of life?** *Medical education* 2011, **45**(4):389-399.
18. Bradford A, Kunik ME, Schulz P, Williams SP, Singh H: **Missed and delayed diagnosis of dementia in primary care: prevalence and contributing factors.** *Alzheimer disease and associated disorders* 2009, **23**(4):306.
19. Gerritsen DL, Oyeboode J, Gove D: **Ethical implications of the perception and portrayal of dementia.** *Dementia* 2016:1471301216654036.
20. Aminzadeh F, Molnar FJ, Dalziel WB, Ayotte D: **A review of barriers and enablers to diagnosis and management of persons with dementia in primary care.** *Canadian Geriatrics Journal* 2012, **15**(3):85.
21. Perry M, Draskovic I, van Achterberg T, van Eijken MIJ, Lucassen P, vernooij-Dassen MJFJ, Olde Rikkert MGM: **Development and validation of quality indicators for dementia diagnosis and management in a primary care setting.** *Journal of the American Geriatrics Society* 2010, **58**(3):557-563.
22. Ahmad S, Orrell M, Iliffe S, Gracie A: **GPs' attitudes, awareness, and practice regarding early diagnosis of dementia.** *Br J Gen Pract* 2010, **60**(578):e360-e365.
23. Hawkins RM: **Self-efficacy: a predictor but not a cause of behavior.** *Journal of behavior therapy and experimental psychiatry* 1992, **23**(4):251-256.
24. Kaduszkiewicz H, Bachmann C, van den Bussche H: **Telling "the truth" in dementia--do attitude and approach of general practitioners and specialists differ?** *Patient Educ Couns* 2008, **70**(2):220-226.
25. Yaffe MJ, Orzeck P, Barylak L: **Family physicians' perspectives on care of dementia patients and family caregivers.** *Canadian Family Physician* 2008, **54**(7):1008-1015.
26. Jennings AA, Foley T, Walsh KA, Coffey A, Browne JP, Bradley CP: **General practitioners' knowledge, attitudes, and experiences of managing behavioural and psychological symptoms of dementia: A mixed-methods systematic review.** *Int J Geriatr Psychiatry* 2018.
27. Meuser TM, Boise L, Morris JC: **Clinical benefits and practices in dementia care: Implications for health educators.** *Educational Gerontology* 2004, **30**:491-516.
28. Surr CA, Gates C, Irving D, Oyeboode J, Smith SJ, Parveen S, Drury M, Dennison A: **Effective Dementia Education and Training for the Health and Social Care Workforce: A Systematic Review of the Literature.** *Review of Educational Research* 2017, **87**(5):966-1002.

- 1  
2  
3 1 29. Thyrian JR, Hoffmann W: **Dementia care and general physicians-a survey on prevalence, means, attitudes and recommendations.** *Central European journal of public health* 2012, 20(4):270.
- 4 2  
5 3  
6 4 30. Turner S, Iliffe S, Downs M, Wilcock J, Bryans M, Levin E, Keady J, O'Carroll R: **General practitioners' knowledge, confidence and attitudes in the diagnosis and management of dementia.** *Age and Ageing* 2004, 33:461-467.
- 7 4  
8 5  
9 6 31. Iliffe S, Wilcock J, Austin T, Walters K, Rait G, Turner S, Bryans M, Downs M: **Dementia diagnosis and management in primary care developing and testing educational models.** *Dementia* 2002, 1(1):11-23.
- 10 7  
11 8  
12 9 32. Foley T, Boyle S, Jennings A, Smithson WH: **"We're certainly not in our comfort zone": a qualitative study of GPs' dementia-care educational needs.** *BMC family practice* 2017, 18(1):66.
- 13 10  
14 11  
15 12 33. Tullo E, Allan L: **What should we be teaching medical students about dementia?** *Int Psychogeriatr* 2011, 23.
- 16 13  
17 14  
18 15 34. Phillipson L, Magee C, Jones S, Reis S, Skaldzien E: **Dementia attitudes and help-seeking intentions: an investigation of responses to two scenarios of an experience of the early signs of dementia.** *Aging & mental health* 2015, 19(11):968-977.
- 19 15  
20 16  
21 17 35. Mason R, Doherty K, Eccleston C, Annear M, Lo A, Tierney L, McInerney F, Robinson A: **General practitioners attitude and confidence scale for dementia (GPACS-D): confirmatory factor analysis and comparative subscale scores among GPs and supervisors.** *BMC family practice* 2019, 20(1):6.
- 22 18  
23 19  
24 20  
25 21 36. Bandura A: **Health promotion from the perspective of social cognitive theory.** *Psychology and health* 1998, 13(4):623-649.
- 26 22  
27 23  
28 24 37. Fritz CO, Morris PE, Richler JJ: **Effect size estimates: current use, calculations, and interpretation.** *Journal of experimental psychology: General* 2012, 141(1):2.
- 29 24  
30 25  
31 26 38. Milne AJ, Hmailto-West K, Hatzidimitriadou E: **GP attitudes to early diagnosis of dementia: Evidence of improvement.** *Aging and Mental Health* 2005, 9(5):449-455.
- 32 26  
33 27  
34 28 39. Wearne S, Dornan T, Teunissen PW, Skinner T: **General practitioners as supervisors in postgraduate clinical education: an integrative review.** *Medical Education* 2012, 46(12):1161-1173.
- 35 29  
36 30  
37 31 40. Practitioners TRACoG: **Curriculum for Australian general practice: Users Guide 2018.**
- 38 32  
39 33  
40 34  
41  
42  
43  
44  
45  
46  
47  
48  
49  
50  
51  
52  
53  
54  
55  
56  
57  
58  
59  
60

1  
2  
3  
4  
5  
6  
7  
8  
9  
10  
11  
12  
13  
14  
15  
16  
17  
18  
19  
20  
21  
22  
23  
24  
25  
26  
27  
28  
29  
30  
31  
32  
33  
34  
35  
36  
37  
38  
39  
40  
41  
42  
43  
44  
45  
46  
47  
48  
49  
50  
51  
52  
53  
54  
55  
56  
57  
58  
59  
60

1

For peer review only

# BMJ Open

## The effect of a Dementia Education Intervention on the confidence and attitudes of General Practitioners in Australia. A pre test post test study.

|                                 |                                                                                                                                                                                                                                                                                                                                                                                                                                                                                 |
|---------------------------------|---------------------------------------------------------------------------------------------------------------------------------------------------------------------------------------------------------------------------------------------------------------------------------------------------------------------------------------------------------------------------------------------------------------------------------------------------------------------------------|
| Journal:                        | <i>BMJ Open</i>                                                                                                                                                                                                                                                                                                                                                                                                                                                                 |
| Manuscript ID                   | bmjopen-2019-033218.R1                                                                                                                                                                                                                                                                                                                                                                                                                                                          |
| Article Type:                   | Original research                                                                                                                                                                                                                                                                                                                                                                                                                                                               |
| Date Submitted by the Author:   | 09-Oct-2019                                                                                                                                                                                                                                                                                                                                                                                                                                                                     |
| Complete List of Authors:       | Mason, Ron; University of Tasmania, Wicking Dementia Research and Education Centre<br>Doherty, Kathleen ; University of Tasmania, Faculty of Health<br>Eccleston, Claire; University of Tasmania, Wicking Dementia Research and Education Centre<br>Winbolt, Margaret ; La Trobe University<br>Long, Marita; University of Tasmania, Wicking Dementia Research and Education Centre<br>Robinson, Andrew; University of Tasmania, Wicking Dementia research and Education Centre |
| <b>Primary Subject Heading</b>: | General practice / Family practice                                                                                                                                                                                                                                                                                                                                                                                                                                              |
| Secondary Subject Heading:      | Medical education and training                                                                                                                                                                                                                                                                                                                                                                                                                                                  |
| Keywords:                       | medical education, confidence and attitudes, dementia diagnosis, general practitioners                                                                                                                                                                                                                                                                                                                                                                                          |
|                                 |                                                                                                                                                                                                                                                                                                                                                                                                                                                                                 |

SCHOLARONE™  
Manuscripts



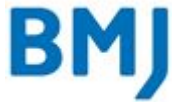

I, the Submitting Author has the right to grant and does grant on behalf of all authors of the Work (as defined in the below author licence), an exclusive licence and/or a non-exclusive licence for contributions from authors who are: i) UK Crown employees; ii) where BMJ has agreed a CC-BY licence shall apply, and/or iii) in accordance with the terms applicable for US Federal Government officers or employees acting as part of their official duties; on a worldwide, perpetual, irrevocable, royalty-free basis to BMJ Publishing Group Ltd ("BMJ") its licensees and where the relevant Journal is co-owned by BMJ to the co-owners of the Journal, to publish the Work in this journal and any other BMJ products and to exploit all rights, as set out in our [licence](#).

The Submitting Author accepts and understands that any supply made under these terms is made by BMJ to the Submitting Author unless you are acting as an employee on behalf of your employer or a postgraduate student of an affiliated institution which is paying any applicable article publishing charge ("APC") for Open Access articles. Where the Submitting Author wishes to make the Work available on an Open Access basis (and intends to pay the relevant APC), the terms of reuse of such Open Access shall be governed by a Creative Commons licence – details of these licences and which [Creative Commons](#) licence will apply to this Work are set out in our licence referred to above.

Other than as permitted in any relevant BMJ Author's Self Archiving Policies, I confirm this Work has not been accepted for publication elsewhere, is not being considered for publication elsewhere and does not duplicate material already published. I confirm all authors consent to publication of this Work and authorise the granting of this licence.

1  
2  
3 1 **Title: The effect of a Dementia Education Intervention on the confidence and attitudes of**  
4  
5  
6 2 **General Practitioners in Australia. A pre-test post-test study.**  
7

8  
9 3 **Authors**

10  
11  
12 4 Ron Mason (Ron.Mason@utas.edu.au)

13  
14  
15 5 Kathleen Doherty (Kathleen.Doherty@utas.edu.au)

16  
17  
18 6 Claire Eccleston (Claire.Eccleston@utas.edu.au)

19  
20  
21 7 Margaret Winbolt (Margaret.Winbolt@latrobe.edu.au)

22  
23  
24 8 Marita Long (Marita.Long@utas.edu.au)

25  
26  
27 9 Andrew Robinson (Andrew Robinson@utas.edu.au)

28  
29  
30 10 Correspondence to: Ron Mason, Wicking Dementia Research and Education Centre,  
31  
32  
33 11 University of Tasmania, Private Bag 143, Hobart, TAS 7001

34  
35  
36 12  
37  
38  
39  
40  
41  
42  
43  
44  
45  
46  
47  
48  
49  
50  
51  
52  
53  
54  
55  
56  
57  
58  
59  
60

1  
2  
3 1 Abstract  
4

5  
6 2 *Objectives:* This study assessed the impact of a Dementia Education Workshop on the  
7  
8  
9 3 confidence and attitudes of GP Registrars (GPR) and GP Supervisors (GPS) in relation to the  
10  
11 4 early diagnosis and management of dementia.  
12

13  
14 5 *Design:* Pre-test post-test research design.  
15

16  
17 6 *Setting:* Continuing medical education in Australia.  
18

19  
20 7 *Participants:* 332 GP Registrars and 114 GP Supervisors.  
21

22  
23 8 *Interventions:* Registrars participated in a three hour face to face workshop while  
24  
25  
26 9 Supervisors participated in a 2 hour modified version designed to assist with the education  
27  
28  
29 10 and supervision of registrars.  
30

31  
32 11 *Main outcome measures:* The General Practitioners Confidence and Attitude scale for  
33  
34 12 Dementia (GPACS-D) was used to assess overall confidence, attitude to care and  
35  
36 13 engagement. A t test for paired samples was used to identify potential differences from  
37  
38  
39 14 pre-workshop (T1) to post workshop (T2) for each GP group. A t test for independent  
40  
41  
42 15 samples was undertaken to ascertain differences between each workshop group. A Cohen's  
43  
44 16 d was calculated to measure the effect size of any observed difference between T1 and T2  
45  
46 17 scores.  
47

48  
49 18 *Results:* Significant increases in scores were recorded for '*Confidence in Clinical Abilities*',  
50  
51  
52 19 '*Attitude to Care*' and '*Engagement*' between pre and post-test periods. GP Registrars  
53  
54 20 exhibited the greatest increase in scores for *Confidence in Clinical Abilities* and *Engagement*.  
55

56  
57 21 *Conclusions:* Targeted educational interventions can improve attitude, increase confidence  
58  
59  
60 22 and reduce negative attitudes towards engagement of participating GPs.

1  
2  
3 1 *Article Summary*  
4  
5

6 2 Strengths and limitations of this study  
7  
8

- 9  
10 3 • The sample of Registrars and Supervisors is representative of the broader GP  
11  
12 4 population in Australia.  
13  
14 5 • While the workshop for GP Registrars was compulsory this was not the case for GP  
15  
16 6 Supervisors, thus a self-selection bias is possible.  
17  
18 7 • Confidence, Attitudes and Engagement were measured via GPACS-D, a validated  
19  
20 8 tool.  
21  
22 9 • While each of the subscales included items relating to early diagnosis, the survey did  
23  
24 10 not fully capture attitudes towards disclosure or perceived self-efficacy with regard  
25  
26 11 to communication.  
27  
28  
29  
30  
31  
32  
33  
34  
35  
36  
37  
38  
39  
40  
41  
42  
43  
44  
45  
46  
47  
48  
49  
50  
51  
52  
53  
54  
55  
56  
57  
58  
59  
60

## 1 Introduction

2  
3  
4  
5  
6  
7  
8  
9  
10  
11  
12  
13  
14  
15  
16  
17  
18  
19  
20  
21  
22  
23  
24  
25  
26  
27  
28  
29  
30  
31  
32  
33  
34  
35  
36  
37  
38  
39  
40  
41  
42  
43  
44  
45  
46  
47  
48  
49  
50  
51  
52  
53  
54  
55  
56  
57  
58  
59  
60

2 General Practitioners (GPs) are central to the early diagnosis and management of dementia [1]. Early diagnosis provides the opportunity for patients, carers and family to be informed about the condition, its prognosis, treatment options and support [2, 3] and allows the patient to plan for their future and be active participants in decision-making [4, 5].

6 Obstacles to timely diagnosis and intervention may include a lack of diagnostic tests/certainty [6] and lack of confidence in diagnostic skills and management [7], while negative attitudes towards diagnosis, disclosure and treatment [8-10] may also affect diagnosis rates. Further, stigma may delay recognition and diagnosis through concealment, minimisation or dismissal of early signs and symptoms [11]. Patients often present with co-occurrent conditions, further complicating the clinical picture [3, 12].

12 It is estimated that one third of GPs lack confidence in their diagnostic skills, while two thirds lack confidence in the management of behaviours associated with dementia [7], or feel they have little or nothing to offer patients presenting with dementia [13], with a third of GPs failing to routinely disclose the diagnosis [7, 14, 15]. Relatedly, pessimism surrounding dementia prognosis, and inability to offer curative treatment [16] may lead to an attitude of 'therapeutic nihilism' among GPs [7, 11], which reflects a biomedical definition of treatment and an ethos centred around curing people [16], while simultaneously ignoring therapeutic interventions that may benefit people with dementia and their carers [17-19].

21 Illiffe (2003) argues that low rates of dementia diagnosis are not only a result of knowledge and skills deficits but also failure to transfer acquired knowledge into clinical practice [9]. Relatedly, Boise et al. (2005) state that attitude rather than knowledge is a key determinant

1 of whether a GP undertakes a full assessment [2], and others argue that the diagnostic and  
2 management practices of GPs towards dementia may be significantly affected by underlying  
3 beliefs and attitudes [20, 21]. While social psychological theory suggests a relationship  
4 between perceptions of self-efficacy, effort and avoidance [22], GPs hesitancy to diagnose  
5 dementia may not be explicit. Rather it may manifest in a reluctance to formalise a diagnosis  
6 or preferentially treat co-occurring conditions for which treatment options are available [10,  
7 23], referring on because of limited treatment options [24], questioning the (traditional) role  
8 of the GP in treating dementia [25], or having insufficient resources [15].

9  
10 Changing attitudes towards the early diagnosis of dementia has been identified as a  
11 significant task for medical educators, with the key to countering such attitudes being  
12 targeted educational campaigns [26]. Moreover, evidence suggests that the focus of GP  
13 training around dementia should encompass more than knowledge acquisition and aim to  
14 improve confidence and attitude [27]. While GP attitudes toward caring for people with  
15 dementia have been shown to be positive [28], fear of misdiagnosis [6] and lack of confidence  
16 in diagnostic and dementia management skills have been reported to be of particular concern  
17 in multiple studies with a lack of effective education and training frequently cited as an  
18 underlying cause [7, 21, 29].

19 Comprehensive dementia education for GPs should include epidemiological knowledge,  
20 communicating a diagnosis, symptom management, and support services for patients and  
21 their carers [30, 31]. Tullo (2011) emphasises the importance of personhood, quality of life  
22 and communication with patients [32], while Phillipson (2015) argues that training  
23 interventions should place an emphasis on the slow progression of the condition, the  
24 treatments available, and maintenance of quality of life [33].

1  
2  
3 1  
4  
5  
6 2

In Australia GPs typically are trained in an apprenticeship model with a key aspect of training involving experienced GPs (Supervisors) providing support to the GP registrar (GPR) within a general practice setting. Supervisors facilitate registrar learning through identifying learning needs, encouraging reflective learning and practice, guiding access to resources, providing advice on applying knowledge to specific patient cases and role modelling interactions with patients (22).

7  
8 8  
9  
10 9  
11  
12 10  
13  
14 11  
15  
16 12  
17  
18 13  
19  
20 14  
21  
22 15  
23  
24 16  
25  
26 17  
27  
28 18  
29  
30 19  
31  
32 20  
33  
34 21  
35  
36 22  
37  
38 23  
39  
40 24  
41  
42 25  
43  
44 26  
45  
46 27  
47  
48 28  
49  
50 29  
51  
52 30  
53  
54 31  
55  
56 32  
57  
58 33  
59  
60 34

Tailored training workshops were developed specifically to augment this interaction and address dementia specific training needs. Directed at both Supervisors and GPRs, we have previously shown them to be effective in improving dementia knowledge [34]. Here we examine the impact of these workshops on attitudes and confidence toward dementia with a view to improving management of dementia in general practice.

## Method

### *Study aims and design*

In Australia GP Registrars are required to engage in a learning program consisting of a number of learning units conducted by regional training providers in each state. “The Recognising, Diagnosing and Managing Dementia in General Practice” workshop was developed by the Wicking Dementia Research and Education Centre as a response to the expressed absence of appropriate dementia related content in GP Registrar training programs. Training was conducted at regional training offices in 6 Australian states (Tasmania, New South Wales, Victoria, Queensland, Australian Capital Territory and South Australia). The GP registrar workshop consists of two 1.5-hour face to face presentations delivered by medical educators focusing on (a) recognising and diagnosing dementia and (b)

1  
2  
3 1 managing dementia in General Practice. The Supervisor's workshop, also conducted face-to-  
4  
5  
6 2 face and for similar durations, is a modified version of that delivered to Registrars in that it  
7  
8 3 seeks to support Supervisors to teach registrars the diagnosis and management content  
9  
10 4 provided in the registrar program (see Tierney et al 2019 [34]). The strong focus on  
11  
12  
13 5 providing a framework for decision making for the recognition, diagnosis and management  
14  
15 6 of dementia is complemented by tools and resources that are aimed at improving both  
16  
17 7 diagnostic capacity and providing ongoing care and support for people with dementia and  
18  
19 8 their family and/or carers. There is a stronger focus on the lived experience of dementia and more  
20  
21 9 in-depth coverage of some aspects of dementia diagnosis and management in the Registrar's  
22  
23 10 workshop than in the Supervisors workshop.

### 24 25 26 27 28 11 *Sampling and Participants*

29  
30  
31 12 Purposive sampling methods were employed to recruit participants from 18 dementia  
32  
33 13 education workshops conducted in six Australian States between 2014 and 2018. The  
34  
35 14 sample comprised 2 cohorts; those who undertook the GP Registrars Workshop (n=355) and  
36  
37 15 those who undertook the Supervisors Workshop (n=121). Of these groups, 332 GPRs and  
38  
39 16 114 Supervisors completed the survey, representing a response rate of 93% and 94%  
40  
41 17 respectively. The GP Registrar workshop comprised recently graduated GPs (GP Registrars)  
42  
43 18 who were undertaking vocational training within a General Practice setting, while the  
44  
45 19 Supervisor group comprised medical educators (n=9), supervisors (n=87) and GPs (n=18).

### 46 47 48 49 50 51 20 52 53 54 21 55 56 57 22 *Process and measures*



1  
2  
3 1 A research assistant not associated with delivery of the workshop administered the survey.  
4  
5  
6 2 All workshop participants were invited to complete the GPACS-D survey [38] immediately  
7  
8 3 before (T1) and immediately after (T2) the workshop. Participants were provided with an  
9  
10 4 information sheet about the research, were informed that the survey was entirely voluntary  
11  
12  
13 5 and that completion of the survey implied consent. The impact of the workshops on  
14  
15 6 confidence and attitude was measured using the GPACS-D which comprises 3 subscales;  
16  
17 7 *Confidence in Clinical Abilities* (6 items), *Attitude to Care* (6 items) and *Engagement* (3 items)  
18  
19 8 and validated using confirmatory factor analysis [35]. The GPACS-D is a reliable and valid  
20  
21 9 measure of attitude and confidence change before and after targeted dementia education.  
22  
23 10 A Likert scale is employed scoring from 1 (strongly agree) to 5 (strongly disagree). Total  
24  
25 11 subscale scores are standardised with a minimum score of 1 and a maximum score of 5 so  
26  
27 12 that comparisons can be made between subscales [36]. The scoring system is described in  
28  
29 13 detail in Mason et al (2019)[35].  
30  
31  
32  
33  
34

#### 35 14 *Analysis*

36  
37  
38  
39 15 We were interested in the impact of the respective workshops on GP Registrars (GPRs) and  
40  
41 16 GP Supervisors. We hypothesised that the Supervisor group would differ from the GPR  
42  
43 17 group in attitude and confidence given their experience as practicing GPs.  
44  
45

46  
47 18 Descriptive statistics were generated for demographic characteristics. Means and  
48  
49 19 confidence intervals were calculated for subscale scores and the individual items that made  
50  
51 20 up each of the subscales, for both Registrar and Supervisor groups. We conducted t-tests for  
52  
53 21 independent samples to identify differences between groups, while t-tests for paired  
54  
55 22 samples were used to identify any significant differences in scores for each group between  
56  
57 23 T1 and T2. T-tests are robust to violations of assumptions of normality [37, 38]. We applied  
58  
59  
60

1  
2  
3 1 Levene's test of equality of variance to establish homogeneity of variance. Adjusted 'p'  
4  
5 2 values were reported where heterogeneity of variance was identified.  
6  
7  
8 3 Cohen's d was calculated to measure the effect size of any observed difference between T1  
9  
10 4 and T2 scores for each group with  $d=0.2$  equivalent to a 'small' effect size, 0.5 a 'medium'  
11  
12 5 effect size and 0.8 or above a 'large' effect size [39]. All data analyses were conducted using  
13  
14 6 SPSS (Version 22).  
15  
16  
17

### 18 7 *Ethics approval*

19  
20 8 A University Human Research Ethics Committee reviewed and approved this study  
21  
22 9 (Reference Number: H0012046). Before the workshop commenced, the study was described  
23  
24 10 to participants and all participants were given an Information Sheet. Return of the  
25  
26 11 completed surveys at the end of the workshop implied their consent for use of the data.  
27  
28  
29

### 30 12 *Patient and Public involvement*

31  
32  
33 13 There was no patient or public involvement in this study.  
34  
35

### 36 14 *Results*

37  
38  
39 15 446 respondents were included in the analysis comprising 332 attendees at GP Registrar  
40  
41 16 workshops (the GPR group) and 114 attendees from the Supervisor workshop (the  
42  
43 17 Supervisor group) (Table 1). Supervisors were significantly older than GPRs ( $t(414)=21.121$ ;  
44  
45 18  $p<.000$ ), and more had undertaken prior dementia education ( $\chi^2=20.263$ ;  $p<.000$ ), although  
46  
47 19 this proportion was small for both groups. More Supervisors had provided professional care  
48  
49 20 to someone with dementia than GPRs ( $\chi^2=11.294$ ;  $p=.001$ ), while similar proportions of  
50  
51 21 both groups had a family member with dementia.  
52  
53  
54  
55  
56  
57  
58  
59  
60

1 We compared age and gender in our sample (GPACS-D) with other samples containing registrars and  
 2 or supervisors to gauge the representativeness of our sample. These included; The General Practice  
 3 Supervisors Australia Survey (GPSA) (2017)[40] for Supervisor characteristics, and The Australian  
 4 General Practice Training Program Survey (AGPT) (2018)[41] and Registrars' Clinical Encounters in  
 5 Training (ReCEnT) (2018)[42] for Registrars. An examination of these samples revealed that the  
 6 GPACS-D sample is broadly representative of the GP population. A slightly larger proportion of females  
 7 was found in the Supervisor group in the GPACS-D sample, while minimal differences emerged for  
 8 age in both Registrars and Supervisor groups.

11 *Table 1: Sample Characteristics*

| Demographics               | GP Registrars<br>(n=332) | Supervisors<br>(n=114) |
|----------------------------|--------------------------|------------------------|
| Age                        | 33.03 (sd=6.1)           | 49.8 (sd=10.5)         |
| Male                       | 40.2% (n=129)            | 50% (n=56)             |
| Australian born            | 41.9% (n=139)            | 39.5% (n=45)           |
| Previous dementia training | 5.6% (n=18)              | 20% (n=22)             |
| Provided professional care | 87% (n=280)              | 98% (n=108)            |
| Family member dementia     | 35.5% (n=114)            | 38.2 (n=42)            |

13 The GPACS-D assessed the impact of each of the workshops on three constructs;

14 *Confidence in Clinical Abilities, Attitude to Care and Engagement.*

15 Items in the *Confidence in clinical abilities* subscale reflect a GP's perception of their  
 16 capacity to diagnose, treat and manage dementia. Analysis of scores for each of the items  
 17 comprising this subscale is shown in Table 2.

18 *Table 2: Confidence in Clinical Abilities. Pre and Post Workshop scores by Role.*

1

| Confidence in Clinical Knowledge                                        | Role          | PreTest |           | Post Test |           | t     | p*    | Mean Difference | Cohen's D |
|-------------------------------------------------------------------------|---------------|---------|-----------|-----------|-----------|-------|-------|-----------------|-----------|
|                                                                         |               | Score   | 95% CI    | Score     | 95% CI    |       |       |                 |           |
| Overall Score                                                           | GPR (n=332)   | 2.67    | 2.61-2.74 | 3.69      | 3.63-3.76 | 17.61 | 0.000 | 1.06            | 1.71      |
|                                                                         | Super (n=114) | 3.28+   | 3.14-3.42 | 4.03+     | 3.93-4.13 | 7.58  | 0.000 | 0.76            | 1.15      |
| Frustration at not being able to effectively treat people with dementia | GPR (n=332)   | 2.49    | 2.39-2.59 | 3.55      | 3.46-3.65 | 17.56 | 0.000 | 1.07            | 1.177     |
|                                                                         | Super (n=114) | 2.94+   | 2.73-3.15 | 3.94+     | 3.78-4.11 | 9.42  | 0.000 | 0.8             | 1.004     |
| Confident in ability to discuss legalities                              | GPR (n=332)   | 2.32    | 2.22-2.42 | 3.25      | 3.16-3.35 | 17.65 | 0.000 | 0.95            | 1.021     |
|                                                                         | Super (n=114) | 2.96+   | 2.75-3.16 | 3.6+      | 3.42-3.77 | 5.73  | 0.000 | 0.4             | 0.637     |
| Confidence in ability to diagnose                                       | GPR (n=332)   | 2.65    | 2.56-2.73 | 3.82      | 3.74-3.90 | 23.85 | 0.000 | 1.19            | 1.525     |
|                                                                         | Super (n=114) | 3.31+   | 3.15-3.47 | 4.18+     | 4.06-4.29 | 11.11 | 0.000 | 0.88            | 1.149     |
| Confident in ability to provide medical care                            | GPR (n=332)   | 2.86    | 2.77-2.94 | 3.8       | 3.73-3.88 | 20.31 | 0.000 | 0.94            | 1.276     |
|                                                                         | Super (n=114) | 3.52+   | 3.36-3.69 | 4.21+     | 4.10-4.32 | 8.66  | 0.000 | 0.7             | 0.935     |
| Confident in ability to provide advice about symptoms                   | GPR (n=332)   | 2.70    | 2.61-2.78 | 3.70      | 3.62-3.78 | 22.02 | 0.000 | 1.01            | 1.34      |
|                                                                         | Super (n=114) | 3.23+   | 3.07-3.39 | 3.95+     | 3.82-4.09 | 8.24  | 0.000 | 0.74            | 0.906     |
| Confident in knowledge of local resources                               | GPR (n=332)   | 2.43    | 2.33-2.52 | 3.47      | 3.37-3.57 | 20.26 | 0.000 | 1.07            | 1.201     |
|                                                                         | Super (n=114) | 3.04+   | 2.86-3.21 | 3.79+     | 3.63-3.95 | 9.38  | 0.000 | 0.79            | 0.856     |

GPR, n=332; GPS (Supervisor), n=114.

+Indicates a significant difference between groups at the .05 level of significance (t test for independent samples).

\* Indicates a significant difference between pre and post intervention periods at the .05 level of significance (t test for paired samples).

While both GPRs and Supervisors were significantly more confident after the workshops, Supervisors were significantly more confident in their clinical abilities than GPRs both before (t(438)=8.424; p<.000) ) and after their respective workshops (t(420)=5.328;p<.000), GPRs exhibited a significantly greater improvement in score than Supervisors (t(414)=3.797; p<.000) ), while the effect size of the change in *Confidence in clinical abilities* was strong for both groups and greatest for GPRs .Supervisors recorded a higher level of confidence than GPRs on all items both before and after the workshop, although both groups improved significantly across all items (Table 2). GPRs exhibited larger score changes on all items after the workshop.

11

1  
2  
3 1 Supervisors reported a higher score for 'confidence in ability to diagnose dementia' than  
4  
5  
6 2 GPRs both before and after the workshop . However, only 13.8% of GPRs were confident in  
7  
8 3 their diagnostic ability before the workshop compared to 44.2% of Supervisors, rising to  
9  
10 4 60.4% GPRs post workshop compared to 62.6% post for Supervisors.

11  
12  
13 5 Confidence in 'ability to provide appropriate medical care' also increased significantly for  
14  
15  
16 6 both groups, with Supervisors recording a higher mean score both before ( $t(439)=4.150$ ;  
17  
18 7  $p<.000$ ) and after the workshop ( $t(421)=4.053$ ;  $p<.000$ ), while a strong effect size was  
19  
20 8 observed for score changes in both groups (GPR,  $d=1.276$ ; Supervisors,  $d=.935$ ). An increase  
21  
22 9 in the proportion of GPRs agreeing with the statement (18.7% to 59.8%) was observed after  
23  
24  
25 10 the workshop.

26  
27  
28  
29 11 Confidence in 'providing advice about managing dementia related symptoms' improved  
30  
31 12 markedly for both groups, with Supervisors recording a significantly higher score than GPRs  
32  
33 13 ( $t(421)=4.662$ ;  $p<.000$ ). Only 13.8% of GPRs were confident pre-workshop increasing to  
34  
35 14 56.3% post workshop, with 9.5% strongly agreeing. Before the workshop 48.5% of  
36  
37  
38 15 Supervisors agreed that they were confident in providing advice (8.8% strongly agreed),  
39  
40 16 increasing to 67% after the workshop (27.4% strongly agreed).

#### 41 42 43 44 17 Attitude to Care

45  
46  
47 18 Items in the *Attitude to Care* subscale reflect aspects of the provision of care for patients  
48  
49 19 and their families. Analysis of scores for each of the items comprising this subscale is shown  
50  
51 20 in Table 3.

52  
53  
54  
55 21 Table 3: *Attitude to Care. Pre and Post Workshop Scores by Role*

56  
57  
58 22  
59  
60 23

| Attitude To Care                                   | Role          | Pre test Score | 95% CI    | Post Test Score | 95% CI    | t    | p*    | Mean difference | Cohen's D |
|----------------------------------------------------|---------------|----------------|-----------|-----------------|-----------|------|-------|-----------------|-----------|
| Overall Score                                      | GPR (n=332)   | 4.35           | 4.30-4.39 | 4.70            | 4.65-4.74 | 17.6 | 0.000 | 0.34            | 0.84      |
|                                                    | Super (n=114) | 4.35           | 4.26-4.43 | 4.59            | 4.51-4.66 | 7.58 | 0.000 | 0.25            | 0.57      |
| Much can be done to improve lives of patient       | GPR (n=332)   | 4.22           | 4.14-4.30 | 4.54            | 4.47-4.61 | 6.98 | 0.000 | 0.32            | 0.483     |
|                                                    | Super (n=114) | 4.37+          | 4.25-4.50 | 4.61            | 4.51-4.72 | 4.43 | 0.000 | 0.26            | 0.401     |
| Early detection benefits the patient               | GPR (n=332)   | 4.32           | 4.24-4.40 | 4.73+           | 4.67-4.80 | 8.38 | 0.000 | 0.39            | 0.612     |
|                                                    | Super (n=114) | 4.21           | 4.06-4.37 | 4.52            | 4.38-4.66 | 3.92 | 0.000 | 0.3             | 0.393     |
| Important family/carers seek external support      | GPR (n=332)   | 4.56           | 4.50-4.63 | 4.81+           | 4.76-4.86 | 6.98 | 0.000 | 0.23            | 0.473     |
|                                                    | Super (n=114) | 4.52           | 4.41-4.64 | 4.67            | 4.57-4.77 | 2.69 | 0.007 | 0.14            | 0.262     |
| Important family carers contact Alzheimer's Aust.  | GPR (n=332)   | 4.38           | 4.30-4.45 | 4.69            | 4.63-4.75 | 7.92 | 0.000 | 0.31            | 0.509     |
|                                                    | Super (n=114) | 4.42           | 4.30-4.45 | 4.64            | 4.53-4.75 | 4.01 | 0.000 | 0.21            | 0.347     |
| GPs in best position to organise care              | GPR (n=332)   | 3.95           | 3.86-4.04 | 4.4             | 4.33-4.48 | 9.41 | 0.000 | 0.46            | 0.59      |
|                                                    | Super (n=114) | 4.06           | 3.90-4.22 | 4.44            | 4.33-4.48 | 4.68 | 0.000 | 0.42            | 0.492     |
| Patients should be informed early so they can plan | GPR (n=332)   | 4.31           | 4.23-4.39 | 4.82+           | 4.76-4.88 | 9.92 | 0.000 | 0.48            | 0.817     |
|                                                    | Super (n=114) | 4.28           | 4.14-4.43 | 4.62            | 4.47-4.76 | 4.25 | 0.000 | 0.35            | 0.447     |

1 GPR, n=332; GPS (Supervisor), n=114.

2 +Indicates a significant difference between groups at the .05 level of significance (t test for independent samples).

3 \* Indicates a significant difference between pre and post intervention periods at the .05 level of significance (t test for  
4 paired samples).

5  
6 Overall mean scores for *Attitude to Care* (Table 3) were equivalent for Supervisors and GPRs  
7 prior to the workshops and increased significantly for both GPRs and Supervisors following  
8 the workshop, with moderate effect sizes for the increases (Table 3). GPRs scored  
9 significantly higher than Supervisors post workshop (  $t(420)=2.463;p=.014$ ).

10 Significantly higher mean scores were reported for GPRs compared to Supervisors for 'early  
11 detection benefits the patient' ( $z=3.21; p<.000$ )  $t(422)=2.965;p=.003$ ) and 'Patients should be  
12 informed early, so they can plan for their future' ( $t(422)=3.135;p=.002$ ) Table 3).

13 Both groups reported significant increases in agreement that 'early detection of dementia  
14 benefits the patient', which had a moderate effect size for GPRs and a weak effect size for  
15 Supervisors. The greatest difference reported was for those strongly agreeing. GPRs  
16 recorded an increase in those strongly agreeing (from 47.3% pre-workshop to 77.9% post  
17 workshop) compared to an 18 % increase for Supervisor's (44.2% to 62.6%) post workshop.

1  
2  
3 1 Similar results were obtained for the item 'Patients with dementia should be informed early  
4  
5 2 so they can plan for the future'. While both groups reported significant increases in those  
6  
7 3 agreeing with the benefits of informing patients early, GPRs had significantly higher scores  
8  
9 4 than Supervisors post workshop (4.82 versus 4.62) and recorded a larger increase in score. A  
10  
11 5 change with a strong effect size was observed for GPRs and with a moderate effect size for  
12  
13 6 Supervisors.

17  
18 7 Both GPR and Supervisor groups recorded increases in those agreeing that 'it is important  
19  
20 8 that relatives/family/carers of dementia seek external support'. The post workshop mean  
21  
22 9 score for GPRs was greater than for Supervisors ( $t(422)=2.530$ ;  $p=.012$ ), while GPRs also  
23  
24 10 exhibited the greatest improvement

### 29 11 *Engagement*

31  
32 12 Engagement measures a GP's perceptions towards treating dementia, and includes fear of  
33  
34 13 communicating a diagnosis, frustration in managing dementia and a preference for treating  
35  
36 14 other conditions (Table 4).

37  
38  
39  
40 15 Both Supervisors and GPRs recorded a significantly higher score for *Engagement* post  
41  
42 16 workshop, while Supervisors reported greater *Engagement* than GPRs at baseline  
43  
44 17 ( $t(439)=5.877$ ;  $p<.000$ ) and after the workshop ( $t(422)=5.091$ ;  $p<.000$ ). A moderate effect  
45  
46 18 size was observed for the score change shown for each group.

50 19 Table 4: *Engagement; Pre and Post Workshop Scores by Role*

51  
52  
53  
54 20

| Fears and Frustrations | Role          | Pre        | Post Test |       | t         | p*    | Mean difference | Cohen's D |        |
|------------------------|---------------|------------|-----------|-------|-----------|-------|-----------------|-----------|--------|
|                        |               | test Score | 95% CI    | Score |           |       |                 |           | 95% CI |
| Overall Score          | GPR (n=332)   | 2.98       | 2.90-3.06 | 3.42  | 3.34-3.50 | 12.06 | 0.000           | 0.44      | 0.61   |
|                        | Super (n=114) | 3.44+      | 3.30-3.58 | 3.84+ | 3.70-3.99 | 6.97  | 0.000           | 0.41      | 0.53   |

|                                        |               |       |           |       |           |       |       |      |       |
|----------------------------------------|---------------|-------|-----------|-------|-----------|-------|-------|------|-------|
| Managing dementia frustrating          | GPR (n=332)   | 3.00  | 2.91-3.10 | 3.51  | 3.40-3.61 | 9.23  | 0.000 | 0.37 | 0.569 |
|                                        | Super (n=114) | 3.45+ | 3.26-3.64 | 3.91+ | 3.75-4.07 | 4.721 | 0.000 | 0.27 | 0.494 |
| Fear of communicating a diagnosis      | GPR (n=332)   | 3.88  | 3.77-3.99 | 4.14  | 4.04-4.24 | 4.79  | 0.000 | 0.27 | 0.277 |
|                                        | Super (n=114) | 4.16+ | 3.98-4.34 | 4.53+ | 4.39-4.67 | 3.63  | 0.000 | 0.36 | 0.431 |
| Preference for treating other diseases | GPR (n=332)   | 2.77  | 2.66-2.87 | 3.2   | 3.09-3.31 | 8.87  | 0.000 | 0.42 | 0.44  |
|                                        | Super (n=114) | 3.27+ | 3.09-3.45 | 3.64+ | 3.46-3.31 | 5.09  | 0.000 | 0.4  | 0.355 |

GPR, n=332; GPS (Supervisor), n=114.

+Indicates a significant difference between groups at the .05 level of significance (t test for independent samples).

\* Indicates a significant difference between pre and post intervention periods at the .05 level of significance (t test for paired samples).

Supervisors recorded significantly higher mean scores for each of the 3 items comprising engagement at both pre and post workshop periods.

Both GPR and Supervisor groups reported less frustration managing dementia post workshop, while Supervisors exhibited significantly less frustration at both pre workshop, while Supervisors exhibited significantly less frustration at both pre (t(439)=4.570; p<.000) and post workshop periods (t(422)=3.914; p<.000) than GPRs. The greatest improvement was reported by GPRs, with moderate effect sizes exhibited for both groups. The proportion disagreeing with the statement that 'dementia was frustrating to manage' increased from 19.5% to 39.4% for the GPR group which was similar magnitude of change to Supervisors (31% to 50.5%). However, a significant proportion of both groups were still undecided about this statement post workshop (GPRs 33.1%, 19.6% Supervisors).

As with other aspects of the subscale, Supervisors reported less fear of communicating a diagnosis than GPRs at both pre (t(439)=2.603; p=.010) and post workshop periods (t(422)=4.120; p<.000) with a moderate effect for Supervisors and a weak effect for GPRs.

Similar results were obtained for a preference to treat other diseases, with both groups recording significant improvement after the workshop. Supervisors recorded a higher mean score than GPRs at both pre (t(439)=4.869; p<.000) and post workshop periods (t(422)=4.053; p<.000), while GPRs exhibited the greatest increase, with moderate effect



1  
2  
3 1 observed for both groups. The proportion of GPRs agreeing to a preference for treating  
4  
5 2 other diseases decreased from 32% pre-workshop to 18.6% post workshop, compared to  
6  
7 3 18.6% to 10.3% for Supervisors. However, a large proportion of each group were neutral to  
8  
9 4 the statement before and after the workshop, with a decreased proportion of Supervisors  
10  
11 5 (42.5% pre, 32.7% post) and a relatively unchanged proportion of GPRs (38.1% pre, 39%  
12  
13 6 post) reporting neutral views on this item.  
14  
15  
16  
17

## 18 7 Discussion

19  
20  
21 8 This study examined the impact of tailored dementia education workshops on the attitudes  
22  
23 9 and confidence of both GP Registrars and GP Supervisors towards dementia. Attending  
24  
25 10 tailored workshops resulted in significant improvements in attitudes, confidence and  
26  
27 11 engagement of both groups. While increased confidence and reduced negative attitudes  
28  
29 12 towards the management of dementia have previously been reported to correlate with a  
30  
31 13 self-reported history of prior dementia training [17], this study demonstrates a direct and  
32  
33 14 immediate impact of a training intervention.  
34  
35  
36  
37  
38

39 15 In some respects the positive *Attitude to Care* at baseline was not surprising given that GPs  
40  
41 16 are reported to have a positive attitude with respect to their role in providing care and early  
42  
43 17 diagnosis for people with dementia [28, 43]. However, the further improvements in this  
44  
45 18 subscale shown after the workshop highlight the effectiveness of the workshop's focus on  
46  
47 19 early warning signs and on the importance of diagnosis and management approaches, all of  
48  
49 20 which are intended to influence participants to more effectively engage people with  
50  
51 21 dementia and their families. These results suggest that workshop attendance is useful in  
52  
53 22 preparing GP registrars for practice and may enhance practice in experienced GPs who act  
54  
55 23 as their Supervisors.  
56  
57  
58  
59  
60

1 The confidence of the GP registrar group, while not as high as Supervisors, significantly  
2 improved post workshop, albeit from a notably low level. This improvement provides insight  
3 into the importance of targeting education beyond the traditional bio-medical focus typical  
4 of much medical education[16], often with minimal focus on therapeutic interventions [17-  
5 19]. Differences in pre-test confidence between the cohorts are not surprising given GPR's  
6 are generally younger and less experienced [21]. The greater magnitude of change for GP  
7 Registrars in this study would suggest that elements restricted to the Registrars' workshop,  
8 and perhaps in particular elements that teach skills in diagnosis, provision of appropriate  
9 medical care and management of dementia related symptoms, may particularly impact on  
10 confidence, again highlighting its applicability to GP specialty training.

11 However, it is interesting that only 44% of Supervisors reported confidence to diagnose  
12 dementia pre-workshop, rising to only around 60% post-workshop. Similar findings were  
13 evident in the items related to confidence providing advice and appropriate medical care. It  
14 was also notable that at both pre and post workshop periods Registrars had more positive  
15 attitudes about the benefits of early diagnosis than Supervisors. This finding may be  
16 influenced by the Supervisors' underlying beliefs and attitudes [20, 21], which in turn may  
17 delay diagnosis in practice, particularly given attitudes rather than knowledge have been  
18 identified as a key determinant of whether a GP undertakes a full assessment [2].

19 Addressing these gaps is essential if GP Supervisors are to effectively support GPRs to  
20 develop their dementia diagnostic and management skills in the clinic in the context of the  
21 apprenticeship model of GP training utilised in Australia [44, 45].

22 A positive impact on engagement was also observed, with both groups recording  
23 significantly improved scores after each of the workshops. The higher scores for the GP

1 Supervisors group may in part reflect their level of exposure and experience to dementia.  
2  
3  
4  
5  
6  
7  
8  
9  
10  
11  
12  
13  
14  
15  
16  
17  
18  
19  
20  
21  
22  
23  
24  
25  
26  
27  
28  
29  
30  
31  
32  
33  
34  
35  
36  
37  
38  
39  
40  
41  
42  
43  
44  
45  
46  
47  
48  
49  
50  
51  
52  
53  
54  
55  
56  
57  
58  
59  
60

1 Supervisors group may in part reflect their level of exposure and experience to dementia.  
2 However, it is concerning that pre workshop only 31% of Supervisors disagreed with the  
3 statement 'dementia is frustrating to manage', with 19.5 % of GPRs disagreeing. While these  
4 scores improved post workshop this does suggest a high level of frustration [36]. Indeed, the  
5 literature suggests GPs' perceptions of their capacity to diagnose, communicate a diagnosis  
6 and manage dementia may impact on the extent to which they engage with a person with  
7 suspected or actual dementia or how much effort they apply to it [36].  
8 Of note, GPRs commenced the workshop with a low likelihood of having experienced any  
9 prior dementia training, despite 87% having provided professional care to people with  
10 dementia. This lack of training has implications for the GPs' knowledge of dementia, as we  
11 have previously demonstrated [1]. Results reported recently suggest that particularly for  
12 GPRs, the workshop increases their base knowledge of dementia [1]. It is possible that this is  
13 related to their increased confidence levels as demonstrated in this study. Educational and  
14 health literature indicates that knowledge is typically correlated with both attitudes and  
15 perceptions of self-efficacy [46]. Taken together, the positive impacts of these workshops  
16 may translate to improved diagnosis rates and/or support to people with dementia.  
17 It is clear that effective educational interventions involve more than knowledge and skills  
18 acquisition [27]. In particular, designing educational initiatives requires a cognisance of not  
19 only clinical issues but the values, attitudes and experiences of those being trained. In this  
20 context findings from this study can be used to identify specific components of attitude and  
21 confidence that may be able to be targeted in future workshops. This point is especially  
22 important given the importance placed on attitudes in relation to how a GP approaches  
23 dementia. GPs tend to be knowledgeable about dementia [9, 26], but low rates of diagnosis

1 persist[10], suggesting that more than simply knowledge is involved, and that a GP's  
2 attitude towards the benefits of diagnosis, support and management is essential for  
3 effective clinical practice.

4 In consideration of this, educational interventions should aim to change the way GPs view  
5 dementia and their role in managing the condition. Such interventions should support GPs  
6 adoption of therapeutic approaches to treatment and management rather than a purely  
7 medical one with a curative focus, with the overall aim of increasing engagement between  
8 the GP, the person with dementia and their families or carer.

9 While this study provides insights into confidence and attitudes as these relate to the  
10 diagnosis and management of dementia and the effectiveness of educational interventions  
11 on confidence and attitudes there were some limitations. For Supervisors, there was the  
12 likelihood of self-selection bias given that they volunteered for the workshop. For registrars,  
13 while training is compulsory, the choice of modules undertaken is purely voluntary.

14 The study design was pre and post, measuring impact of the workshop. It is possible, as  
15 with any pre-post survey research, that response bias may have resulted from the  
16 perceived need for socially desirable responses on the part of the participant. However,  
17 there were no incentives for bias, survey responses were anonymous, and items were non-  
18 leading.

19 Our study was focussed on the immediate impact of the workshops on the confidence and  
20 attitudes of participants. Future research should focus on providing evidence of the impact  
21 of the workshop on changes in behaviour as it relates to the diagnosis and management of  
22 dementia. Additionally, communication has been identified as a crucial part of the  
23 diagnostic procedure. While we did address some aspects of communication, survey items

1  
2  
3 1 did not fully capture the construct [35], therefore more work is required in this area given  
4  
5  
6 2 its importance in relation to not only providing a diagnosis but also the doctor-patient  
7  
8 3 relationship.  
9

#### 10 4 Conclusion

11  
12  
13  
14 5 Targeted educational interventions can improve attitude, increase confidence and reduce  
15  
16 6 negative attitudes towards engagement of participating GP registrars and supervisors.  
17  
18 7 Findings highlight a clear need for GPs to have access to targeted workshops especially  
19  
20 8 given the growing numbers of people with dementia.  
21  
22  
23  
24  
25 9

#### 26 10 Contributor Information

27  
28 11 Study design: MW AR; Data Collection: RM; Data analysis and interpretation: RM, KD, CE; Drafting the  
29  
30 12 article: RM; Critical revision of the article: RM, KD, CE, MW,ML, AR; Final approval: all authors.  
31  
32

#### 33 13 Guarantor Information

34 14 Andrew Robinson

#### 35 15 Competing Interests Declaration

36 16  
37  
38 17 All authors have completed the ICMJE uniform disclosure form at [www.icmje.org/coi\\_disclosure.pdf](http://www.icmje.org/coi_disclosure.pdf)  
39  
40 18 and declare: all authors had financial support from the Victorian and Tasmanian Dementia Training  
41  
42 19 Study Centre (DTSC) until 2016 and Dementia Training Australia (DTA) from 2016 for the submitted  
43  
44 20 work; no financial relationships with any organisations that might have an interest in the submitted  
45  
46 21 work in the previous three years; no other relationships or activities that could appear to have  
47  
48 22 influenced the submitted work.

#### 49 23 Transparency Declaration

50 24 The authors affirm that this manuscript is an honest, accurate and transparent account of the study  
51  
52 25 being reported and that no important aspects of the study have been omitted.

#### 53 26 Role of the Funding Source

54  
55 27 This project was funded by the Australian Government Department of Health through the Victorian  
56  
57 28 and Tasmanian Dementia Training Study Centre (DTSC) until 2016 and then Dementia Training  
58  
59 29 Australia (DTA) from 2016. The study design was developed by the Wicking Dementia Research and  
60  
30 Education Centre (WDREC) and submitted to the funder (DTSC and DTA) for approval. Data collection,  
31 analysis, interpretation and reporting was undertaken by the WDREC in partnership with Dr Margaret

1 Winbolt from La Trobe University, who was Director of the DTSC and is the Director of DTA. All authors  
 2 had full access to all the data (including statistical reports and tables) in the study and can take  
 3 responsibility for the integrity of the data and the accuracy of the data analysis.

#### 4 **Data Sharing**

5 The data set is not available as ethics approval does not allow release.

#### 6 **Acknowledgements**

7 We would like to acknowledge the significant contribution made by Dr Mandy Lo in  
 8 developing the GP workshops.

#### 9 **References**

- 11 1. Geldmacher DS, Kerwin DR: **Practical diagnosis and management of dementia due to Alzheimer's disease in the primary care setting: an evidence-based approach.** *The primary care companion for CNS disorders* 2013, **15**(4).
- 12 2. Connell CM, Boise L, Stuckey JC, Holmes SB, Hudson ML: **Attitudes toward the diagnosis and disclosure of dementia among family caregivers and primary care physicians.** *The Gerontologist* 2004, **44**(4):500-507.
- 13 3. Pathak KP, Montgomery A: **General practitioners' knowledge, practices, and obstacles in the diagnosis and management of dementia.** *Aging & mental health* 2015, **19**(10):912-920.
- 14 4. Bamford C, Lamont S, Eccles M, Robinson L, May C, Bond J: **Disclosing a diagnosis of dementia: a systematic review.** *International journal of geriatric psychiatry* 2004, **19**(2):151-169.
- 15 5. Ford E, Greenslade N, Paudyal P, Bremner S, Smith HE, Banerjee S, Sadhwani S, Rooney P, Oliver S, Cassell J: **Predicting dementia from primary care records: A systematic review and meta-analysis.** *PloS one* 2018, **13**(3):e0194735.
- 16 6. Milne A: **Dementia screening and early diagnosis: The case for and against.** *Health, risk & society* 2010, **12**(1):65-76.
- 17 7. Cahill S, Clark M, O'Connell H, Lawlor B, Coen RF, Walsh C: **The attitudes and practices of general practitioners regarding dementia diagnosis in Ireland.** *International Journal of Geriatric Psychiatry* 2008, **23**:663-669.
- 18 8. Koch T, Iliffe S: **Rapid appraisal of barriers to the diagnosis and management of patients with dementia in primary care: a systematic review.** *BMC Family Practice* 2010, **11**(1):1.
- 19 9. Iliffe S, Manthorpe J, Eden A: **Sooner or later? Issues in the early diagnosis of dementia in general practice: a qualitative study.** *Family Practice* 2003, **20**(4):376-381.
- 20 10. van Hout H, Vernooij-Dassen M, Bakker K, Blom M, Grol R: **General practitioners on dementia: tasks, practices and obstacles.** *Patient education and counseling* 2000, **39**(2):219-225.
- 21 11. Vernooij-Dassen MJ, Moniz-Cook ED, Woods RT, Leppeleire JD, Leuschner A, Zanetti O, Rotrou Jd, Kenny G, Franco M, Peters V: **Factors affecting timely recognition and diagnosis of dementia across Europe: from awareness to stigma.** *International journal of geriatric psychiatry* 2005, **20**(4):377-386.

1  
2  
3  
4  
5  
6  
7  
8  
9  
10  
11  
12  
13  
14  
15  
16  
17  
18  
19  
20  
21  
22  
23  
24  
25  
26  
27  
28  
29  
30  
31  
32  
33  
34  
35  
36  
37  
38  
39  
40  
41  
42  
43  
44  
45  
46  
47  
48  
49  
50  
51  
52  
53  
54  
55  
56  
57  
58  
59  
60

12. Hansen EC, Hughes C, Routley G, Robinson AL: **General Practitioners' experiences and understandings of diagnosing dementia: Factors impacting on early diagnosis.** *Social Science and Medicine* 2008, **67**(2008):1776-1783.
13. McIntosh IB, Swanson V, Power KG, Rae C: **General practitioners' and nurses' perceived roles, attitudes and stressors in the management of people with dementia.** *HEALTH BULLETIN-SCOTTISH OFFICE DEPARTMENT OF HEALTH* 1999, **57**:35-43.
14. Lahjibi-Paulet H, Alain AD, Minard A, Gaxatte C, Saint-Jean O, Somme D: **Attitudes towards Alzheimer's disease: A qualitative study of the role played by social representation on a convenient sample of French general practitioners.** *Aging Clinical and Experimental Research* 2012, **24**(4):384-390.
15. Somme D, Gautier A, Pin S, Corvol A: **General practitioner's clinical practices, difficulties and educational needs to manage Alzheimer's disease in France: analysis of national telephone-inquiry data.** *BMC family practice* 2013, **14**(1):81.
16. Gibbins J, McCoubrie R, Forbes K: **Why are newly qualified doctors unprepared to care for patients at the end of life?** *Medical education* 2011, **45**(4):389-399.
17. Bradford A, Kunik ME, Schulz P, Williams SP, Singh H: **Missed and delayed diagnosis of dementia in primary care: prevalence and contributing factors.** *Alzheimer disease and associated disorders* 2009, **23**(4):306.
18. Gerritsen DL, Oyebode J, Gove D: **Ethical implications of the perception and portrayal of dementia.** *Dementia* 2016:1471301216654036.
19. Aminzadeh F, Molnar FJ, Dalziel WB, Ayotte D: **A review of barriers and enablers to diagnosis and management of persons with dementia in primary care.** *Canadian Geriatrics Journal* 2012, **15**(3):85.
20. Perry M, Draskovic I, van Achterberg T, van Eijken MIJ, Lucassen P, vernooij-Dassen MJFJ, Olde Rikkert MGM: **Development and validation of quality indicators for dementia diagnosis and management in a primary care setting.** *Journal of the American Geriatrics Society* 2010, **58**(3):557-563.
21. Ahmad S, Orrell M, Iliffe S, Gracie A: **GPs' attitudes, awareness, and practice regarding early diagnosis of dementia.** *Br J Gen Pract* 2010, **60**(578):e360-e365.
22. Hawkins RM: **Self-efficacy: a predictor but not a cause of behavior.** *Journal of behavior therapy and experimental psychiatry* 1992, **23**(4):251-256.
23. Kaduszkiewicz H, Bachmann C, van den Bussche H: **Telling "the truth" in dementia--do attitude and approach of general practitioners and specialists differ?** *Patient Educ Couns* 2008, **70**(2):220-226.
24. Yaffe MJ, Orzeck P, Barylak L: **Family physicians' perspectives on care of dementia patients and family caregivers.** *Canadian Family Physician* 2008, **54**(7):1008-1015.
25. Jennings AA, Foley T, Walsh KA, Coffey A, Browne JP, Bradley CP: **General practitioners' knowledge, attitudes, and experiences of managing behavioural and psychological symptoms of dementia: A mixed-methods systematic review.** *Int J Geriatr Psychiatry* 2018.
26. Meuser TM, Boise L, Morris JC: **Clinical benefits and practices in dementia care: Implications for health educators.** *Educational Gerontology* 2004, **30**:491-516.
27. Surr CA, Gates C, Irving D, Oyebode J, Smith SJ, Parveen S, Drury M, Dennison A: **Effective Dementia Education and Training for the Health and Social Care Workforce: A Systematic Review of the Literature.** *Review of Educational Research* 2017, **87**(5):966-1002.
28. Thyrian JR, Hoffmann W: **Dementia care and general physicians-a survey on prevalence, means, attitudes and recommendations.** *Central European journal of public health* 2012, **20**(4):270.
29. Turner S, Iliffe S, Downs M, Wilcock J, Bryans M, Levin E, Keady J, O'Carroll R: **General practitioners' knowledge, confidence and attitudes in the diagnosis and management of dementia.** *Age and Ageing* 2004, **33**:461-467.

- 1  
2  
3 1 30. Iliffe S, Wilcock J, Austin T, Walters K, Rait G, Turner S, Bryans M, Downs M: **Dementia diagnosis and management in primary care developing and testing educational models.** *Dementia* 2002, **1**(1):11-23.
- 4 2  
5 3  
6 4 31. Foley T, Boyle S, Jennings A, Smithson WH: **“We’re certainly not in our comfort zone”: a qualitative study of GPs’ dementia-care educational needs.** *BMC family practice* 2017, **18**(1):66.
- 7 5  
8 6  
9 7 32. Tullo E, Allan L: **What should we be teaching medical students about dementia?** *Int Psychogeriatr* 2011, **23**.
- 10 8  
11 9 33. Phillipson L, Magee C, Jones S, Reis S, Skaldzien E: **Dementia attitudes and help-seeking intentions: an investigation of responses to two scenarios of an experience of the early signs of dementia.** *Aging & mental health* 2015, **19**(11):968-977.
- 12 10  
13 11 34. Tierney L, Mason R, Doherty K, Winbolt M, Long M, Robinson A: **Workshops on diagnosis and management of dementia for general practitioners: a pre–post intervention study of dementia knowledge.** *BMJ open* 2019, **9**(4):e027804.
- 14 12  
15 13 35. Mason R, Doherty K, Eccleston C, Annear M, Lo A, Tierney L, McInerney F, Robinson A: **General practitioners attitude and confidence scale for dementia (GPACS-D): confirmatory factor analysis and comparative subscale scores among GPs and supervisors.** *BMC family practice* 2019, **20**(1):6.
- 16 14  
17 15 36. Bandura A: **Health promotion from the perspective of social cognitive theory.** *Psychology and health* 1998, **13**(4):623-649.
- 18 16  
19 17 37. Field A: **Discovering statistics using IBM SPSS statistics:** Sage; 2013.
- 20 18  
21 19 38. Tabachnick BG, Fidell LS, Osterlind SJ: **Using multivariate statistics.** 2001.
- 22 20  
23 21 39. Fritz CO, Morris PE, Richler JJ: **Effect size estimates: current use, calculations, and interpretation.** *Journal of experimental psychology: General* 2012, **141**(1):2.
- 24 22  
25 23 40. Australia GPS: **National GP Supervisor Survey.** 2017.
- 26 24  
27 25 41. Taylor R, Radloff A, Edwards E: **Australian general practice training program.** *National report on the* 2017.
- 28 26  
29 27 42. Magin P, Morgan S, Henderson K, Tapley A, McElduff P, Pearlman J, Goode S, Spike N, Laurence C, Scott J: **Family medicine trainees’ clinical experience of chronic disease during training: a cross-sectional analysis from the registrars’ clinical encounters in training study.** *BMC medical education* 2014, **14**(1):260.
- 30 28  
31 29 43. Milne AJ, Hmailto-West K, Hatzidimitriadou E: **GP attitudes to early diagnosis of dementia: Evidence of improvement.** *Aging and Mental Health* 2005, **9**(5):449-455.
- 32 30  
33 31 44. Wearne S, Dornan T, Teunissen PW, Skinner T: **General practitioners as supervisors in postgraduate clinical education: an integrative review.** *Medical Education* 2012, **46**(12):1161-1173.
- 34 32  
35 33 45. Practitioners TRACoG: **Curriculum for Australian general practice: Users Guide 2018.** 2018.
- 36 34  
37 35  
38 36  
39 37 46. McCall LM, Clarke DM, Rowley G: **Does a continuing medical education course in mental health change general practitioner knowledge, attitude and practice and patient outcomes.** *Primary Care Mental Health* 2004, **2**(1):13-22.
- 40 38  
41 39  
42 40  
43 41  
44 42  
45 43  
46  
47  
48  
49  
50  
51  
52  
53  
54  
55  
56  
57  
58  
59  
60



1  
2  
3  
4  
5  
6  
7  
8  
9  
10  
11  
12  
13  
14  
15  
16  
17  
18  
19  
20  
21  
22  
23  
24  
25  
26  
27  
28  
29  
30  
31  
32  
33  
34  
35  
36  
37  
38  
39  
40  
41  
42  
43  
44  
45  
46  
47  
48  
49  
50  
51  
52  
53  
54  
55  
56  
57  
58  
59  
60

1

For peer review only

# BMJ Open

## The effect of a Dementia Education Intervention on the confidence and attitudes of General Practitioners in Australia. A pre-test post-test study.

|                                 |                                                                                                                                                                                                                                                                                                                                                                                                                                                                                                                                                              |
|---------------------------------|--------------------------------------------------------------------------------------------------------------------------------------------------------------------------------------------------------------------------------------------------------------------------------------------------------------------------------------------------------------------------------------------------------------------------------------------------------------------------------------------------------------------------------------------------------------|
| Journal:                        | <i>BMJ Open</i>                                                                                                                                                                                                                                                                                                                                                                                                                                                                                                                                              |
| Manuscript ID                   | bmjopen-2019-033218.R2                                                                                                                                                                                                                                                                                                                                                                                                                                                                                                                                       |
| Article Type:                   | Original research                                                                                                                                                                                                                                                                                                                                                                                                                                                                                                                                            |
| Date Submitted by the Author:   | 10-Dec-2019                                                                                                                                                                                                                                                                                                                                                                                                                                                                                                                                                  |
| Complete List of Authors:       | Mason, Ron; University of Tasmania, Wicking Dementia Research and Education Centre<br>Doherty, Kathleen ; University of Tasmania, Wicking Dementia Research and Education Centre<br>Eccleston, Claire; University of Tasmania, Wicking Dementia Research and Education Centre<br>Winbolt, Margaret ; La Trobe University, Australian Centre for Evidence Based Aged Care<br>Long, Marita; University of Tasmania, Wicking Dementia Research and Education Centre<br>Robinson, Andrew; University of Tasmania, Wicking Dementia research and Education Centre |
| <b>Primary Subject Heading</b>: | General practice / Family practice                                                                                                                                                                                                                                                                                                                                                                                                                                                                                                                           |
| Secondary Subject Heading:      | Medical education and training                                                                                                                                                                                                                                                                                                                                                                                                                                                                                                                               |
| Keywords:                       | medical education, confidence and attitudes, dementia diagnosis, general practitioners                                                                                                                                                                                                                                                                                                                                                                                                                                                                       |
|                                 |                                                                                                                                                                                                                                                                                                                                                                                                                                                                                                                                                              |

SCHOLARONE™  
Manuscripts



I, the Submitting Author has the right to grant and does grant on behalf of all authors of the Work (as defined in the below author licence), an exclusive licence and/or a non-exclusive licence for contributions from authors who are: i) UK Crown employees; ii) where BMJ has agreed a CC-BY licence shall apply, and/or iii) in accordance with the terms applicable for US Federal Government officers or employees acting as part of their official duties; on a worldwide, perpetual, irrevocable, royalty-free basis to BMJ Publishing Group Ltd ("BMJ") its licensees and where the relevant Journal is co-owned by BMJ to the co-owners of the Journal, to publish the Work in this journal and any other BMJ products and to exploit all rights, as set out in our [licence](#).

The Submitting Author accepts and understands that any supply made under these terms is made by BMJ to the Submitting Author unless you are acting as an employee on behalf of your employer or a postgraduate student of an affiliated institution which is paying any applicable article publishing charge ("APC") for Open Access articles. Where the Submitting Author wishes to make the Work available on an Open Access basis (and intends to pay the relevant APC), the terms of reuse of such Open Access shall be governed by a Creative Commons licence – details of these licences and which [Creative Commons](#) licence will apply to this Work are set out in our licence referred to above.

Other than as permitted in any relevant BMJ Author's Self Archiving Policies, I confirm this Work has not been accepted for publication elsewhere, is not being considered for publication elsewhere and does not duplicate material already published. I confirm all authors consent to publication of this Work and authorise the granting of this licence.

1  
2  
3 1 **Title: The effect of a Dementia Education Intervention on the confidence and attitudes of**  
4  
5  
6 2 **General Practitioners in Australia. A pre-test post-test study.**  
7

8  
9 3 **Authors**

10  
11  
12 4 Ron Mason ([Ron.Mason@utas.edu.au](mailto:Ron.Mason@utas.edu.au))

13  
14  
15 5 Wicking Dementia Research and Education Centre, University of

16  
17 6 Tasmania, Hobart, Tasmania, Australia

18  
19  
20 7 Kathleen Doherty ([Kathleen.Doherty@utas.edu.au](mailto:Kathleen.Doherty@utas.edu.au))

21  
22  
23 8 Wicking Dementia Research and Education Centre, University of

24  
25 9 Tasmania, Hobart, Tasmania, Australia

26  
27  
28 10 Claire Eccleston ([Claire.Eccleston@utas.edu.au](mailto:Claire.Eccleston@utas.edu.au))

29  
30  
31 11 Wicking Dementia Research and Education Centre, University of

32  
33 12 Tasmania, Hobart, Tasmania, Australia

34  
35  
36 13 Margaret Winbolt ([Margaret.Winbolt@latrobe.edu.au](mailto:Margaret.Winbolt@latrobe.edu.au))

37  
38 14 Australian Centre for Evidence Based Aged Care, La Trobe University, Melbourne, Victoria,

39  
40 15 Australia

41  
42  
43 16 Marita Long ([Marita.Long@utas.edu.au](mailto:Marita.Long@utas.edu.au))

44  
45  
46 17 Wicking Dementia Research and Education Centre, University of

47  
48 18 Tasmania, Hobart, Tasmania, Australia

49  
50  
51 19 Andrew Robinson ([Andrew.Robinson@utas.edu.au](mailto:Andrew.Robinson@utas.edu.au))

52  
53  
54  
55  
56  
57  
58  
59  
60

1  
2  
3  
4  
5  
6  
7  
8  
9  
10  
11  
12  
13  
14  
15  
16  
17  
18  
19  
20  
21  
22  
23  
24  
25  
26  
27  
28  
29  
30  
31  
32  
33  
34  
35  
36  
37  
38  
39  
40  
41  
42  
43  
44  
45  
46  
47  
48  
49  
50  
51  
52  
53  
54  
55  
56  
57  
58  
59  
60

1 Wicking Dementia Research and Education Centre, University of

2 Tasmania, Hobart, Tasmania, Australia

3 Correspondence to: Ron Mason, Wicking Dementia Research and Education Centre,

4 University of Tasmania, Private Bag 143, Hobart, TAS 7001

5

For peer review only

1  
2  
3 1 Abstract  
4  
5

6 2 *Objectives:* This study assessed the impact of a Dementia Education Workshop on the  
7  
8  
9 3 confidence and attitudes of GP Registrars (GPR) and GP Supervisors (GPS) in relation to the  
10  
11 4 early diagnosis and management of dementia.  
12  
13

14 5 *Design:* Pre-test post-test research design.  
15  
16

17 6 *Setting:* Continuing medical education in Australia.  
18  
19

20 7 *Participants:* 332 GP Registrars and 114 GP Supervisors.  
21  
22

23 8 *Interventions:* Registrars participated in a three hour face to face workshop while  
24  
25  
26 9 Supervisors participated in a 2 hour modified version designed to assist with the education  
27  
28  
29 10 and supervision of registrars.  
30

31 11 *Main outcome measures:* The General Practitioners Confidence and Attitude scale for  
32  
33  
34 12 Dementia (GPACS-D) was used to assess overall confidence, attitude to care and  
35  
36  
37 13 engagement. A t test for paired samples was used to identify differences from pre-  
38  
39 14 workshop (T1) to post workshop (T2) for each GP group. A t test for independent samples  
40  
41  
42 15 was undertaken to ascertain differences between each workshop group. A Cohen's d was  
43  
44 16 calculated to measure the effect size of any difference between T1 and T2 scores.  
45  
46

47 17 *Results:* Significant increases in scores were recorded for '*Confidence in Clinical Abilities*',  
48  
49 18 '*Attitude to Care*' and '*Engagement*' between pre and post-test periods. GP Registrars  
50  
51  
52 19 exhibited the greatest increase in scores for *Confidence in Clinical Abilities* and *Engagement*.  
53

54  
55 20 *Conclusions:* Targeted educational interventions can improve attitude, increase confidence  
56  
57  
58 21 and reduce negative attitudes towards engagement of participating GPs.  
59  
60

1  
2  
3 1 *Article Summary*  
4  
5

6 2 Strengths and limitations of this study  
7  
8

- 9 3 • The sample of Registrars and Supervisors is representative of the broader GP  
10 population in Australia.  
11  
12 4 • While the GP Registrars' workshop was compulsory this was not the case for GP  
13 Supervisors, thus self-selection bias is possible.  
14  
15 5 • Confidence, Attitudes and Engagement were measured via GPACS-D, a validated  
16 tool.  
17  
18 6 • While each of the subscales included items relating to early diagnosis, the survey did  
19 not fully capture attitudes towards disclosure or perceived self-efficacy regarding  
20 communication.  
21  
22 7  
23  
24 8  
25  
26 9  
27  
28 10  
29  
30 11  
31  
32 12  
33  
34  
35 13  
36  
37  
38  
39  
40  
41  
42  
43  
44  
45  
46  
47  
48  
49  
50  
51  
52  
53  
54  
55  
56  
57  
58  
59  
60

## 1 Introduction

2  
3  
4  
5  
6  
7  
8  
9  
10  
11  
12  
13  
14  
15  
16  
17  
18  
19  
20  
21  
22  
23  
24  
25  
26  
27  
28  
29  
30  
31  
32  
33  
34  
35  
36  
37  
38  
39  
40  
41  
42  
43  
44  
45  
46  
47  
48  
49  
50  
51  
52  
53  
54  
55  
56  
57  
58  
59  
60

2 General Practitioners (GPs) are central to the early diagnosis and management of dementia [1]. Early diagnosis provides the opportunity for patients, carers and family to be informed about the condition, its prognosis, treatment options and support [2, 3] and allows the patient to plan for their future and be active participants in decision-making [4, 5].

6 Obstacles to timely diagnosis and intervention may include a lack of diagnostic tests/certainty [6] and lack of confidence in diagnostic skills and management [7], while negative attitudes towards diagnosis, disclosure and treatment [8-10] may also affect diagnosis rates. Further, stigma may delay recognition and diagnosis through concealment, minimisation or dismissal of early signs and symptoms [11]. Patients often present with co-occurrent conditions, further complicating the clinical picture [3, 12].

12 It is estimated that one third of GPs lack confidence in their diagnostic skills, while two thirds lack confidence in the management of behaviours associated with dementia [7], or feel they have little or nothing to offer patients presenting with dementia [13], with a third of GPs failing to routinely disclose the diagnosis [7, 14, 15]. Relatedly, pessimism surrounding dementia prognosis, and inability to offer curative treatment [16] may lead to an attitude of 'therapeutic nihilism' among GPs [7, 11], which reflects a biomedical definition of treatment and an ethos centred around curing people [16], while simultaneously ignoring therapeutic interventions that may benefit people with dementia and their carers [17-19].

21 Illiffe (2003) argues that low rates of dementia diagnosis are not only a result of knowledge and skills deficits but also failure to transfer acquired knowledge into clinical practice [9]. Relatedly, Boise et al. (2005) state that attitude rather than knowledge is a key determinant



1  
2  
3 1 of whether a GP undertakes a full assessment [2], and others argue that the diagnostic and  
4  
5 2 management practices of GPs towards dementia may be significantly affected by underlying  
6  
7 3 beliefs and attitudes [20, 21]. While social psychological theory suggests a relationship  
8  
9 4 between perceptions of self-efficacy, effort and avoidance [22], GPs hesitancy to diagnose  
10  
11 5 dementia may not be explicit. Rather it may manifest in a reluctance to formalise a diagnosis  
12  
13 6 or preferentially treat co-occurring conditions for which treatment options are available [10,  
14  
15 7 23], referring on because of limited treatment options [24], questioning the (traditional) role  
16  
17 8 of the GP in treating dementia [25], or having insufficient resources [15].  
18  
19  
20  
21  
22  
23  
24  
25  
26  
27  
28  
29  
30  
31  
32  
33  
34  
35  
36  
37  
38  
39  
40  
41  
42  
43  
44  
45  
46  
47  
48  
49  
50  
51  
52  
53  
54  
55  
56  
57  
58  
59  
60

9  
10 Changing attitudes towards the early diagnosis of dementia has been identified as a  
11  
12 significant task for medical educators, with the key to countering such attitudes being  
13  
14 targeted educational campaigns [26]. Moreover, evidence suggests that the focus of GP  
15  
16 training around dementia should encompass more than knowledge acquisition and aim to  
17  
18 improve confidence and attitude [27]. While GP attitudes toward caring for people with  
19  
20 dementia have been shown to be positive [28], fear of misdiagnosis [6] and lack of confidence  
21  
22 in diagnostic and dementia management skills have been reported to be of particular concern  
23  
24 in multiple studies with a lack of effective education and training frequently cited as an  
25  
26 underlying cause [7, 21, 29].

19 Comprehensive dementia education for GPs should include epidemiological knowledge,  
20  
21 communicating a diagnosis, symptom management, and support services for patients and  
22  
23 their carers [30, 31]. Tullo (2011) emphasises the importance of personhood, quality of life  
24  
25 and communication with patients [32], while Phillipson (2015) argues that training  
26  
27 interventions should place an emphasis on the slow progression of the condition, the  
28  
29 treatments available, and maintenance of quality of life [33].

1  
2  
3 1  
4  
5  
6 2 In Australia GPs typically are trained in an apprenticeship model with a key aspect of  
7  
8 3 training involving experienced GPs (Supervisors) providing support to the GP registrar (GPR)  
9  
10 4 within a general practice setting. Supervisors facilitate registrar learning through identifying  
11  
12 5 learning needs, encouraging reflective learning and practice, guiding access to resources,  
13  
14 6 providing advice on applying knowledge to specific patient cases and role modelling  
15  
16 7 interactions with patients (22).  
17  
18  
19  
20 8 Tailored training workshops were developed specifically to augment this interaction and  
21  
22 9 address dementia specific training needs. Directed at both Supervisors and GPRs, we have  
23  
24 10 previously shown them to be effective in improving dementia knowledge [34]. Here we  
25  
26 11 examine the impact of these workshops on attitudes and confidence toward dementia with  
27  
28 12 a view to improving management of dementia in general practice.  
29  
30  
31  
32  
33 13 Method  
34  
35  
36 14 *Study aims and design*  
37  
38  
39 15 In Australia GP Registrars are required to engage in a learning program consisting of a  
40  
41 16 number of learning units conducted by regional training providers in each state. “The  
42  
43 17 Recognising, Diagnosing and Managing Dementia in General Practice” workshop was  
44  
45 18 developed by the Wicking Dementia Research and Education Centre as a response to the  
46  
47 19 expressed absence of appropriate dementia related content in GP Registrar training  
48  
49 20 programs. Training was conducted at regional training offices in 6 Australian states  
50  
51 21 (Tasmania, New South Wales, Victoria, Queensland, Australian Capital Territory and South  
52  
53 22 Australia). The GP registrar workshop consists of a three hour face to face presentation  
54  
55 23 delivered by medical educators focusing on (a) recognising and diagnosing dementia and (b)  
56  
57  
58  
59  
60

1  
2  
3 1 managing dementia in General Practice. The Supervisors' workshop, also conducted face-to-  
4  
5  
6 2 face and for similar durations, is a modified version of that delivered to Registrars in that it  
7  
8 3 seeks to support Supervisors to teach registrars the diagnosis and management content  
9  
10 4 provided in the registrar program (see Tierney et al 2019 [34]), with a more in-depth  
11  
12  
13 5 coverage of some aspects of dementia diagnosis and management in the Registrars'  
14  
15 6 workshop than in the Supervisors workshop.

17  
18 7 A strong focus on providing a framework for decision making for the recognition, diagnosis  
19  
20 8 and management of dementia is complemented by tools and resources that are aimed at  
21  
22 9 improving both diagnostic capacity and providing ongoing care and support for people with  
23  
24 10 dementia and their family and/or carers. In an attempt to address GPs reluctance to  
25  
26 11 diagnose dementia [35] there is a strong focus on highlighting lived experience in order to  
27  
28 12 situate people with dementia and their carers as central to the process, and to consider  
29  
30 13 diagnosis and management through a biopsychosocial lens [36, 37]. The intent is to facilitate  
31  
32 14 GPs to engage with the process of diagnosis and associated management in a timely and  
33  
34 15 supportive fashion.  
35  
36  
37  
38  
39  
40

#### 41 *Sampling and Participants*

42  
43  
44 17 Purposive sampling methods were employed to recruit participants from 18 dementia  
45  
46 18 education workshops conducted in six Australian States between 2014 and 2018. Lists of  
47  
48 19 GPs attending the GP Registrar and Supervisor workshops were provided by each regional  
49  
50 20 training organisation and used as the sample frame for each region. The list comprised the  
51  
52 21 GP's name and a unique id number to ensure that each pre and post survey matched with  
53  
54 22 the individual.  
55  
56  
57  
58  
59  
60

1  
2  
3 1 The sample comprised 2 cohorts; those who undertook the GP Registrars Workshop (n=355)  
4  
5  
6 2 and those who undertook the Supervisors Workshop (n=121). Of these groups, 332 GPRs  
7  
8 3 and 114 Supervisors completed the survey, representing a response rate of 93% and 94%  
9  
10 4 respectively. The GP Registrar workshop comprised recently graduated GPs (GP Registrars)  
11  
12  
13 5 who were undertaking vocational training within a General Practice setting, while the  
14  
15 6 Supervisor group comprised medical educators (n=9), supervisors (n=87) and GPs (n=18).  
16  
17  
18  
19  
20  
21  
22

### 23 8 *Process and measures*

24  
25 9 The workshop was evaluated using a pre-test post-test framework which employed two  
26  
27 10 measures. Changes in knowledge of dementia were assessed using the Dementia  
28  
29 11 Knowledge Assessment Survey (DKAS) (see Tierney et al. 2019[34]). This paper reports the  
30  
31  
32 12 second arm of the evaluation which utilised the GPACS-D survey [38] to evaluate the impact  
33  
34 13 of the workshops on confidence and attitudes.

35  
36  
37 14 The GPACS-D comprises 3 subscales: *Confidence in Clinical Abilities* (6 items), *Attitude to*  
38  
39 15 *Care* (6 items) and *Engagement* (3 items); and is validated using confirmatory factor analysis  
40  
41  
42 16 [38]. The GPACS-D is a reliable and valid measure of attitude and confidence change before  
43  
44 17 and after targeted dementia education. A Likert scale is employed scoring from 1 (strongly  
45  
46 18 agree) to 5 (strongly disagree). Total subscale scores are standardised with a minimum  
47  
48 19 score of 1 and a maximum score of 5 so that comparisons can be made between subscales  
49  
50 20 [39]. The scoring system is described in detail in Mason et al (2019)[38].  
51  
52  
53

54  
55 21 A research assistant not associated with delivery of the workshop administered the surveys.  
56  
57 22 Pre-test surveys were provided to each participant as they signed in along with an  
58  
59 23 information sheet about the research. Attendees were informed that survey completion  
60

1 was entirely voluntary and that completion implied consent. Participants completed the  
2 surveys immediately before (T1) and immediately after (T2) the workshop, with each pre  
3 and post survey matched via the unique ID for each attendee.

#### 4 *Ethics approval*

5 The Tasmania Social Sciences Human Research Ethics Committee (University of Tasmania)  
6 reviewed and approved this study (Reference Number: H0012046).

#### 7 *Patient and Public involvement*

8 There was no patient or public involvement in this study.

#### 9 *Analysis*

10 We were interested in the impact of the respective workshops on GP Registrars (GPRs) and  
11 GP Supervisors. We hypothesised that the Supervisor group would differ from the GPR  
12 group in attitude and confidence given their experience as practicing GPs.  
13 Descriptive statistics were generated for demographic characteristics. Means and  
14 confidence intervals were calculated for subscale scores and the individual items that made  
15 up each of the subscales, for both Registrar and Supervisor groups. We conducted t-tests for  
16 independent samples to identify differences between groups, while t-tests for paired  
17 samples were used to identify any significant differences in scores for each group between  
18 T1 and T2. T-tests are robust to violations of assumptions of normality [40, 41]. We applied  
19 Levene's test of equality of variance to establish homogeneity of variance. Adjusted 'p'  
20 values were reported where heterogeneity of variance was identified.  
21 Cohen's d was calculated to measure the effect size of any observed difference between T1  
22 and T2 scores for each group with  $d=0.2$  equivalent to a 'small' effect size, 0.5 a 'medium'

1 effect size and 0.8 or above a 'large' effect size [42]. All data analyses were conducted using  
2 SPSS (Version 22).

### 3 *Results*

4 446 respondents were included in the analysis comprising 332 attendees at GP Registrar  
5 workshops (the GPR group) and 114 attendees from the Supervisor workshop (the  
6 Supervisor group) (Table 1). Supervisors were significantly older than GPRs ( $t(414)=21.121$ ;  
7  $p<.001$ ), and more had undertaken prior dementia education ( $\chi^2=20.263$ ;  $p<.001$ ), although  
8 this proportion was small for both groups. More Supervisors had provided professional care  
9 to someone with dementia than GPRs ( $\chi^2=11.294$ ;  $p=.001$ ), while similar proportions of both  
10 groups had a family member with dementia.

11 We compared age and gender in our sample (GPACS-D) with other samples containing  
12 registrars and or supervisors to gauge the representativeness of our sample. These included;  
13 The General Practice Supervisors Australia Survey (GPSA) (2017)[43] for Supervisor  
14 characteristics, and The Australian General Practice Training Program Survey (AGPT)  
15 (2018)[44] and Registrars' Clinical Encounters in Training (ReCEnt) (2018)[45] for Registrars.  
16 An examination of these samples revealed that the GPACS-D sample is broadly representative  
17 of the GP population. A slightly larger proportion of females was found in the Supervisor  
18 group in the GPACS-D sample, while minimal differences emerged for age in both Registrars  
19 and Supervisor groups.

1  
2  
3  
4  
5  
6  
7  
8  
9  
10  
11  
12  
13  
14  
15  
16  
17  
18  
19  
20  
21  
22  
23  
24  
25  
26  
27  
28  
29  
30  
31  
32  
33  
34  
35  
36  
37  
38  
39  
40  
41  
42  
43  
44  
45  
46  
47  
48  
49  
50  
51  
52  
53  
54  
55  
56  
57  
58  
59  
60

1 Table 1: Sample Characteristics – Mean age and frequencies for gender, dementia training,  
2 providing professional care and family member with dementia.

| Demographics               | GP Registrars<br>(n=332) | Supervisors<br>(n=114) |
|----------------------------|--------------------------|------------------------|
| Age                        | 33.03 (sd=6.1)           | 49.8 (sd=10.5)         |
| Male                       | 40.2% (n=129)            | 50% (n=56)             |
| Australian born            | 41.9% (n=139)            | 39.5% (n=45)           |
| Previous dementia training | 5.6% (n=18)              | 20% (n=22)             |
| Provided professional care | 87% (n=280)              | 98% (n=108)            |
| Family member dementia     | 35.5% (n=114)            | 38.2 (n=42)            |

3  
4 The GPACS-D assessed the impact of each of the workshops on three constructs;  
5 *Confidence in Clinical Abilities, Attitude to Care and Engagement.*  
6 Items in the *Confidence in clinical abilities* subscale reflect a GP's perception of their  
7 capacity to diagnose, treat and manage dementia. Analysis of scores for each of the items  
8 comprising this subscale is shown in Table 2.

9 Table 2: *Confidence in Clinical Abilities. Pre and Post Workshop scores by Role.*

| Confidence in Clinical Knowledge                                        | Role          | PreTest Score | 95% CI    | Post Test Score | 95% CI    | t     | p*    | Mean Difference | Cohen's D |
|-------------------------------------------------------------------------|---------------|---------------|-----------|-----------------|-----------|-------|-------|-----------------|-----------|
| Overall Score                                                           | GPR (n=332)   | 2.67          | 2.61-2.74 | 3.69            | 3.63-3.76 | 17.61 | <.001 | 1.06            | 1.710     |
|                                                                         | Super (n=114) | 3.28+         | 3.14-3.42 | 4.03+           | 3.93-4.13 | 7.58  | <.001 | 0.76            | 1.150     |
| Frustration at not being able to effectively treat people with dementia | GPR (n=332)   | 2.49          | 2.39-2.59 | 3.55            | 3.46-3.65 | 17.56 | <.001 | 1.07            | 1.177     |
|                                                                         | Super (n=114) | 2.94+         | 2.73-3.15 | 3.94+           | 3.78-4.11 | 9.42  | <.001 | 0.8             | 1.004     |
| Confident in ability to discuss legalities                              | GPR (n=332)   | 2.32          | 2.22-2.42 | 3.25            | 3.16-3.35 | 17.65 | <.001 | 0.95            | 1.021     |
|                                                                         | Super (n=114) | 2.96+         | 2.75-3.16 | 3.6+            | 3.42-3.77 | 5.73  | <.001 | 0.4             | 0.637     |
| Confidence in ability to diagnose                                       | GPR (n=332)   | 2.65          | 2.56-2.73 | 3.82            | 3.74-3.90 | 23.85 | <.001 | 1.19            | 1.525     |
|                                                                         | Super (n=114) | 3.31+         | 3.15-3.47 | 4.18+           | 4.06-4.29 | 11.11 | <.001 | 0.88            | 1.149     |
| Confident in ability to provide medical care                            | GPR (n=332)   | 2.86          | 2.77-2.94 | 3.8             | 3.73-3.88 | 20.31 | <.001 | 0.94            | 1.276     |
|                                                                         | Super (n=114) | 3.52+         | 3.36-3.69 | 4.21+           | 4.10-4.32 | 8.66  | <.001 | 0.7             | 0.935     |
| Confident in ability to provide advice about symptoms                   | GPR (n=332)   | 2.70          | 2.61-2.78 | 3.70            | 3.62-3.78 | 22.02 | <.001 | 1.01            | 1.340     |
|                                                                         | Super (n=114) | 3.23+         | 3.07-3.39 | 3.95+           | 3.82-4.09 | 8.24  | <.001 | 0.74            | 0.906     |
| Confident in knowledge of local resources                               | GPR (n=332)   | 2.43          | 2.33-2.52 | 3.47            | 3.37-3.57 | 20.26 | <.001 | 1.07            | 1.201     |
|                                                                         | Super (n=114) | 3.04+         | 2.86-3.21 | 3.79+           | 3.63-3.95 | 9.38  | <.001 | 0.79            | 0.856     |

11 GPR, n=332; GPS (Supervisor), n=114.

12

1 +Indicates a significant difference between groups at the .05 level of significance (t test for independent samples).  
2  
3  
4 2 \* Indicates a significant difference between pre and post intervention periods at the .05 level of significance (t test for  
5 3 paired samples).  
6  
7 4 While both GPRs and Supervisors were significantly more confident after the workshops,  
8  
9  
10 5 Supervisors were significantly more confident in their clinical abilities than GPRs both before  
11  
12 6 (t(438)=8.424; p<.001) ) and after their respective workshops (t(420)=5.328;p<.001). GPRs  
13  
14 7 exhibited a significantly greater improvement in score than Supervisors (t(414)=3.797;  
15  
16  
17 8 p<.001). The effect size of the change in *Confidence in clinical abilities* was strong for both  
18  
19  
20 9 groups and greatest for GPRs.

21  
22  
23 10 Before the workshop, only 13.8% of GPRs were 'confident (either strongly agreed or  
24  
25 11 agreed) in their ability to diagnose' compared to 44.2% of Supervisors, rising to 60.4% for  
26  
27 12 GPRs post workshop (62.6% post for Supervisors). A similar change occurred in the  
28  
29  
30 13 confidence of GPRs in their 'ability to provide appropriate medical care', with an increase in  
31  
32 14 agreement (those strongly agreeing or agreeing) from 18.7% to 59.8% after the workshop.  
33  
34  
35 15 Further, only 13.8% of GPRs agreed or strongly agreed that they were confident in  
36  
37 16 'providing advice about managing dementia related symptoms' pre-workshop, compared  
38  
39  
40 17 with 48.5% of Supervisors (8.8% strongly agreed), increasing to 56.3% post workshop for  
41  
42 18 GPRs (9.5% strongly agreed) and 67% for Supervisors (27.4% strongly agreed).

#### 45 19 Attitude to Care

46  
47  
48 20 Items in the *Attitude to Care* subscale reflect aspects of the provision of care for patients  
49  
50  
51 21 and their families. Analysis of scores for each of the items comprising this subscale is shown  
52  
53 22 in Table 3.

54  
55  
56 23 Table 3: *Attitude to Care. Pre and Post Workshop Scores by Role*

57  
58  
59 24



1

| Attitude To Care                                   | Role          | Pre test Score | 95% CI    | Post Test Score | 95% CI    | t    | p*    | Mean difference | Cohen's D |
|----------------------------------------------------|---------------|----------------|-----------|-----------------|-----------|------|-------|-----------------|-----------|
| Overall Score                                      | GPR (n=332)   | 4.35           | 4.30-4.39 | 4.70            | 4.65-4.74 | 17.6 | <.001 | 0.34            | 0.840     |
|                                                    | Super (n=114) | 4.35           | 4.26-4.43 | 4.59            | 4.51-4.66 | 7.58 | <.001 | 0.25            | 0.570     |
| Much can be done to improve lives of patient       | GPR (n=332)   | 4.22           | 4.14-4.30 | 4.54            | 4.47-4.61 | 6.98 | <.001 | 0.32            | 0.483     |
|                                                    | Super (n=114) | 4.37+          | 4.25-4.50 | 4.61            | 4.51-4.72 | 4.43 | <.001 | 0.26            | 0.401     |
| Early detection benefits the patient               | GPR (n=332)   | 4.32           | 4.24-4.40 | 4.73+           | 4.67-4.80 | 8.38 | <.001 | 0.39            | 0.612     |
|                                                    | Super (n=114) | 4.21           | 4.06-4.37 | 4.52            | 4.38-4.66 | 3.92 | <.001 | 0.3             | 0.393     |
| Important family/carers seek external support      | GPR (n=332)   | 4.56           | 4.50-4.63 | 4.81+           | 4.76-4.86 | 6.98 | <.001 | 0.23            | 0.473     |
|                                                    | Super (n=114) | 4.52           | 4.41-4.64 | 4.67            | 4.57-4.77 | 2.69 | 0.007 | 0.14            | 0.262     |
| Important family carers contact Alzheimer's Aust.  | GPR (n=332)   | 4.38           | 4.30-4.45 | 4.69            | 4.63-4.75 | 7.92 | <.001 | 0.31            | 0.509     |
|                                                    | Super (n=114) | 4.42           | 4.30-4.45 | 4.64            | 4.53-4.75 | 4.01 | <.001 | 0.21            | 0.347     |
| GPs in best position to organise care              | GPR (n=332)   | 3.95           | 3.86-4.04 | 4.4             | 4.33-4.48 | 9.41 | <.001 | 0.46            | 0.590     |
|                                                    | Super (n=114) | 4.06           | 3.90-4.22 | 4.44            | 4.33-4.48 | 4.68 | <.001 | 0.42            | 0.492     |
| Patients should be informed early so they can plan | GPR (n=332)   | 4.31           | 4.23-4.39 | 4.82+           | 4.76-4.88 | 9.92 | <.001 | 0.48            | 0.817     |
|                                                    | Super (n=114) | 4.28           | 4.14-4.43 | 4.62            | 4.47-4.76 | 4.25 | <.001 | 0.35            | 0.447     |

2 GPR, n=332; GPS (Supervisor), n=114.

3 +Indicates a significant difference between groups at the .05 level of significance (t test for independent samples).

4 \* Indicates a significant difference between pre and post intervention periods at the .05 level of significance (t test for  
5 paired samples).

6  
7 Overall mean scores for *Attitude to Care* (Table 3) were equivalent for Supervisors and GPRs  
8 prior to the workshops and increased significantly for both GPRs and Supervisors following  
9 the workshop, with moderate effect sizes for the increases. GPRs scored significantly higher  
10 than Supervisors post workshop ( $t(420)=2.463; p=.014$ ).

11 Both groups reported significant increases in agreement that 'early detection of dementia  
12 benefits the patient', though the effect size for Supervisors was weak. The greatest  
13 difference reported was for those strongly agreeing, with a 30.6% change for GPRs (47.3%  
14 pre-workshop to 77.9% post workshop), and only an 18 % increase for Supervisors (44.2% to  
15 62.6%). Similar results were obtained for the item 'Patients with dementia should be  
16 informed early so they can plan for the future', while both GPR and Supervisor groups

1 recorded increases in those agreeing or strongly agreeing that 'it is important that  
2 relatives/family/carers of dementia seek external support'.

### 3 *Engagement*

4 Engagement measures a GP's perceptions towards treating dementia, and includes fear of  
5 communicating a diagnosis, frustration in managing dementia and a preference for treating  
6 other conditions (Table 4). Both Supervisors and GPRs recorded a significantly higher score  
7 for *Engagement* post workshop, while Supervisors reported greater *Engagement* than GPRs  
8 at baseline ( $t(439)=5.877$ ;  $p<.001$ ) and after the workshop ( $t(422)=5.091$ ;  $p<.001$ ). A  
9 moderate effect size was observed for the score change shown for each group.

10 Table 4: *Engagement; Pre and Post Workshop Scores by Role*

| Engagement                                | Role          | Pre test<br>Score | 95% CI    | Post Test<br>Score | 95% CI    | t     | p*    | Mean<br>difference | Cohen's<br>D |
|-------------------------------------------|---------------|-------------------|-----------|--------------------|-----------|-------|-------|--------------------|--------------|
| Overall Score                             | GPR (n=332)   | 2.98              | 2.90-3.06 | 3.42               | 3.34-3.50 | 12.06 | <.001 | 0.44               | 0.610        |
|                                           | Super (n=114) | 3.44+             | 3.30-3.58 | 3.84+              | 3.70-3.99 | 6.97  | <.001 | 0.41               | 0.530        |
| Managing dementia<br>frustrating          | GPR (n=332)   | 3.00              | 2.91-3.10 | 3.51               | 3.40-3.61 | 9.23  | <.001 | 0.37               | 0.569        |
|                                           | Super (n=114) | 3.45+             | 3.26-3.64 | 3.91+              | 3.75-4.07 | 4.721 | <.001 | 0.27               | 0.494        |
| Fear of communicating a<br>diagnosis      | GPR (n=332)   | 3.88              | 3.77-3.99 | 4.14               | 4.04-4.24 | 4.79  | <.001 | 0.27               | 0.277        |
|                                           | Super (n=114) | 4.16+             | 3.98-4.34 | 4.53+              | 4.39-4.67 | 3.63  | <.001 | 0.36               | 0.431        |
| Preference for treating<br>other diseases | GPR (n=332)   | 2.77              | 2.66-2.87 | 3.2                | 3.09-3.31 | 8.87  | <.001 | 0.42               | 0.440        |
|                                           | Super (n=114) | 3.27+             | 3.09-3.45 | 3.64+              | 3.46-3.31 | 5.09  | <.001 | 0.4                | 0.355        |

12 GPR, n=332; GPS (Supervisor), n=114.

13 +Indicates a significant difference between groups at the .05 level of significance (t test for independent samples).

14 \* Indicates a significant difference between pre and post intervention periods at the .05 level of significance (t test for  
15 paired samples).

16  
17 Both Supervisors and GPRs showed an increase in the proportion disagreeing or strongly  
18 disagreeing with the statement that 'dementia was frustrating to manage' (19.5% to 39.4%  
19 for GPRs; 31% to 50.5%). However, a significant proportion of both groups were still  
20 undecided about this statement post workshop (GPRs 33.1%; 19.6% Supervisors).

1  
2  
3 1 The proportion of GPRs agreeing or strongly agreeing to a 'preference for treating other  
4  
5 2 diseases' decreased from 32% pre-workshop to 18.6% post workshop, compared to 18.6%  
6  
7  
8 3 to 10.3% for Supervisors. However, a large proportion of each group were neutral to the  
9  
10 4 statement before and after the workshop, with a decreased proportion of Supervisors  
11  
12 5 (42.5% pre, 32.7% post) and a relatively unchanged proportion of GPRs (38.1% pre, 39%  
13  
14 6 post) reporting neutral views on this item.  
15  
16  
17

## 18 7 Discussion

19  
20  
21 8 This study examined the impact of tailored dementia education workshops on the attitudes  
22  
23 9 and confidence of both GP Registrars and GP Supervisors towards dementia. Attending  
24  
25 10 tailored workshops resulted in significant improvements in attitudes, confidence and  
26  
27 11 engagement of both groups. While increased confidence and reduced negative attitudes  
28  
29 12 towards the management of dementia have previously been reported to correlate with a  
30  
31 13 self-reported history of prior dementia training [17], this study demonstrates a direct and  
32  
33 14 immediate impact of a training intervention.  
34  
35  
36  
37  
38

39 15 In some respects the positive *Attitude to Care* at baseline was not surprising given that GPs  
40  
41 16 are reported to have a positive attitude with respect to their role in providing care and early  
42  
43 17 diagnosis for people with dementia [28, 46]. However, the further improvements in this  
44  
45 18 subscale shown after the workshop highlight the effectiveness of the workshop's focus on  
46  
47 19 early warning signs and on the importance of diagnosis and management approaches, all of  
48  
49 20 which are intended to influence participants to more effectively engage people with  
50  
51 21 dementia and their families. These results suggest that workshop attendance is useful in  
52  
53 22 preparing GP registrars for practice and may enhance practice in experienced GPs who act  
54  
55 23 as their Supervisors.  
56  
57  
58  
59  
60

1 The confidence of the GP registrar group, while not as high as Supervisors, significantly  
2 improved post workshop, albeit from a notably low level. This improvement provides insight  
3 into the importance of targeting education beyond the traditional bio-medical focus typical  
4 of much medical education[16], often with minimal focus on therapeutic interventions [17-  
5 19]. Differences in pre-test confidence between the cohorts are not surprising given GPR's  
6 are generally younger and less experienced [21]. The greater magnitude of change for GP  
7 Registrars in this study would suggest that elements restricted to the Registrars' workshop,  
8 and perhaps in particular elements that teach skills in diagnosis, provision of appropriate  
9 medical care and management of dementia related symptoms, may particularly impact on  
10 confidence, again highlighting its applicability to GP specialty training.

11 However, it is interesting that only 44% of Supervisors reported confidence to diagnose  
12 dementia pre-workshop, rising to only around 60% post-workshop. Similar findings were  
13 evident in the items related to confidence providing advice and appropriate medical care. It  
14 was also notable that at both pre and post workshop periods Registrars had more positive  
15 attitudes about the benefits of early diagnosis than Supervisors. This finding may be  
16 influenced by the Supervisors' underlying beliefs and attitudes [20, 21], which in turn may  
17 delay diagnosis in practice, particularly given attitudes rather than knowledge have been  
18 identified as a key determinant of whether a GP undertakes a full assessment [2].

19 Addressing these gaps is essential if GP Supervisors are to effectively support GPRs to  
20 develop their dementia diagnostic and management skills in the clinic in the context of the  
21 apprenticeship model of GP training utilised in Australia [47, 48].

22 A positive impact on engagement was also observed, with both groups recording  
23 significantly improved scores after each of the workshops. The higher scores for the GP

1 Supervisors group may in part reflect their level of exposure and experience to dementia.  
2  
3  
4  
5  
6  
7  
8  
9  
10  
11  
12  
13  
14  
15  
16  
17  
18  
19  
20  
21  
22  
23  
24  
25  
26  
27  
28  
29  
30  
31  
32  
33  
34  
35  
36  
37  
38  
39  
40  
41  
42  
43  
44  
45  
46  
47  
48  
49  
50  
51  
52  
53  
54  
55  
56  
57  
58  
59  
60

1 Supervisors group may in part reflect their level of exposure and experience to dementia.  
2 However, it is concerning that pre workshop only 31% of Supervisors disagreed with the  
3 statement 'dementia is frustrating to manage', with 19.5 % of GPRs disagreeing. While these  
4 scores improved post workshop this does suggest a high level of frustration [39]. Indeed, the  
5 literature suggests GPs' perceptions of their capacity to diagnose, communicate a diagnosis  
6 and manage dementia may impact on the extent to which they engage with a person with  
7 suspected or actual dementia or how much effort they apply to it [39].  
8 Of note, GPRs commenced the workshop with a low likelihood of having experienced any  
9 prior dementia training, despite 87% having provided professional care to people with  
10 dementia. This lack of training has implications for the GPs' knowledge of dementia, as we  
11 have previously demonstrated [1]. Results reported recently suggest that particularly for  
12 GPRs, the workshop increases their base knowledge of dementia [1]. It is possible that this is  
13 related to their increased confidence levels as demonstrated in this study. Educational and  
14 health literature indicates that knowledge is typically correlated with both attitudes and  
15 perceptions of self-efficacy [49]. Taken together, the positive impacts of these workshops  
16 may translate to improved diagnosis rates and/or support to people with dementia.  
17 It is clear that effective educational interventions involve more than knowledge and skills  
18 acquisition [27]. In particular, designing educational initiatives requires a cognisance of not  
19 only clinical issues but the values, attitudes and experiences of those being trained. In this  
20 context findings from this study can be used to identify specific components of attitude and  
21 confidence that may be able to be targeted in future workshops. This point is especially  
22 important given the importance placed on attitudes in relation to how a GP approaches  
23 dementia. GPs tend to be knowledgeable about dementia [9, 26], but low rates of diagnosis

1 persist[10], suggesting that more than simply knowledge is involved, and that a GP's  
2 attitude towards the benefits of diagnosis, support and management is essential for  
3 effective clinical practice.

4 In consideration of this, educational interventions should aim to change the way GPs view  
5 dementia and their role in managing the condition. Such interventions should support GPs  
6 adoption of therapeutic approaches to treatment and management rather than a purely  
7 medical one with a curative focus, with the overall aim of increasing engagement between  
8 the GP, the person with dementia and their families or carer.

9 While this study provides insights into confidence and attitudes as these relate to the  
10 diagnosis and management of dementia and the effectiveness of educational interventions  
11 on confidence and attitudes there were some limitations. For Supervisors, there was the  
12 likelihood of self-selection bias given that they volunteered for the workshop. For  
13 participating registrars, the workshop was a part of their compulsory training program.

14 The study design was pre and post, measuring impact of the workshop. It is possible, as  
15 with any pre-post survey research, that response bias may have resulted from the  
16 perceived need for socially desirable responses on the part of the participant. However,  
17 there were no incentives for bias, survey responses were anonymous, and items were non-  
18 leading.

19 Our study was focussed on the immediate impact of the workshops on the confidence and  
20 attitudes of participants. Future research should focus on providing evidence of the impact  
21 of the workshop on changes in behaviour as it relates to the diagnosis and management of  
22 dementia. Additionally, communication has been identified as a crucial part of the  
23 diagnostic procedure. While we did address some aspects of communication, survey items

1  
2  
3 1 did not fully capture the construct [38], therefore more work is required in this area given  
4  
5  
6 2 its importance in relation to not only providing a diagnosis but also the doctor-patient  
7  
8 3 relationship.

#### 11 4 Conclusion

14 5 Targeted educational interventions can improve attitude, increase confidence and reduce  
15  
16  
17 6 negative attitudes towards engagement of participating GP registrars and supervisors.  
18  
19 7 Findings highlight a clear need for GPs to have access to targeted workshops especially  
20  
21  
22 8 given the growing numbers of people with dementia.  
23  
24  
25 9

#### 28 10 Contributor Information

29 11 Study design: MW AR; Data Collection: RM; Data analysis and interpretation: RM, KD, CE; Drafting the  
30 12 article: RM; Critical revision of the article: RM, KD, CE, MW,ML, AR; Final approval: all authors.

#### 33 13 Guarantor Information

34 14 Andrew Robinson

#### 37 15 Competing Interests Declaration

38 16 All authors have completed the ICMJE uniform disclosure form at [www.icmje.org/coi\\_disclosure.pdf](http://www.icmje.org/coi_disclosure.pdf)  
39 17 and declare: all authors had financial support from the Victorian and Tasmanian Dementia Training  
40 18 Study Centre (DTSC) until 2016 and Dementia Training Australia (DTA) from 2016 for the submitted  
41 19 work; no financial relationships with any organisations that might have an interest in the submitted  
42 20 work in the previous three years; no other relationships or activities that could appear to have  
43 21 influenced the submitted work.

#### 46 22 Transparency Declaration

48 23 The authors affirm that this manuscript is an honest, accurate and transparent account of the study  
49 24 being reported and that no important aspects of the study have been omitted.

#### 51 25 Role of the Funding Source

53 26 This project was funded by the Australian Government Department of Health through the Victorian  
54 27 and Tasmanian Dementia Training Study Centre (DTSC) until 2016 and then Dementia Training  
55 28 Australia (DTA) from 2016. The study design was developed by the Wicking Dementia Research and  
56 29 Education Centre (WDREC) and submitted to the funder (DTSC and DTA) for approval. Data collection,  
57 30 analysis, interpretation and reporting was undertaken by the WDREC in partnership with Dr Margaret  
58 31 Winbolt from La Trobe University, who was Director of the DTSC and is the Director of DTA. All authors

1 had full access to all the data (including statistical reports and tables) in the study and can take  
2 responsibility for the integrity of the data and the accuracy of the data analysis.

### 3 **Data Sharing**

4 The data set is not available as ethics approval does not allow release.

### 5 **Acknowledgements**

6 We would like to acknowledge the significant contribution made by Dr Mandy Lo in  
7 developing the GP workshops.

### 8 **References**

- 10 1. Geldmacher DS, Kerwin DR: **Practical diagnosis and management of dementia due to  
11 Alzheimer's disease in the primary care setting: an evidence-based approach.** *The primary  
12 care companion for CNS disorders* 2013, **15**(4).
- 13 2. Connell CM, Boise L, Stuckey JC, Holmes SB, Hudson ML: **Attitudes toward the diagnosis and  
14 disclosure of dementia among family caregivers and primary care physicians.** *The  
15 Gerontologist* 2004, **44**(4):500-507.
- 16 3. Pathak KP, Montgomery A: **General practitioners' knowledge, practices, and obstacles in  
17 the diagnosis and management of dementia.** *Aging & mental health* 2015, **19**(10):912-920.
- 18 4. Bamford C, Lamont S, Eccles M, Robinson L, May C, Bond J: **Disclosing a diagnosis of  
19 dementia: a systematic review.** *International journal of geriatric psychiatry* 2004, **19**(2):151-  
20 169.
- 21 5. Ford E, Greenslade N, Paudyal P, Bremner S, Smith HE, Banerjee S, Sadhwani S, Rooney P,  
22 Oliver S, Cassell J: **Predicting dementia from primary care records: A systematic review and  
23 meta-analysis.** *PloS one* 2018, **13**(3):e0194735.
- 24 6. Milne A: **Dementia screening and early diagnosis: The case for and against.** *Health, risk &  
25 society* 2010, **12**(1):65-76.
- 26 7. Cahill S, Clark M, O'Connell H, Lawlor B, Coen RF, Walsh C: **The attitudes and practices of  
27 general practitioners regarding dementia diagnosis in Ireland.** *International Journal of  
28 Geriatric Psychiatry* 2008, **23**:663-669.
- 29 8. Koch T, Iliffe S: **Rapid appraisal of barriers to the diagnosis and management of patients  
30 with dementia in primary care: a systematic review.** *BMC Family Practice* 2010, **11**(1):1.
- 31 9. Iliffe S, Manthorpe J, Eden A: **Sooner or later? issues in the early diagnosis of dementia in  
32 general practice: a qualitative study.** *Family Practice* 2003, **20**(4):376-381.
- 33 10. van Hout H, Vernooij-Dassen M, Bakker K, Blom M, Grol R: **General practitioners on  
34 dementia: tasks, practices and obstacles.** *Patient education and counseling* 2000, **39**(2):219-  
35 225.
- 36 11. Vernooij-Dassen MJ, Moniz-Cook ED, Woods RT, Lepeleire JD, Leuschner A, Zanetti O, Rotrou  
37 Jd, Kenny G, Franco M, Peters V: **Factors affecting timely recognition and diagnosis of  
38 dementia across Europe: from awareness to stigma.** *International journal of geriatric  
39 psychiatry* 2005, **20**(4):377-386.
- 40 12. Hansen EC, Hughes C, Routley G, Robinson AL: **General Practitioners' experiences and  
41 understandings of diagnosing dementia: Factors impacting on early diagnosis.** *Social  
42 Science and Medicine* 2008, **67**(2008):1776-1783.



1  
2  
3  
4  
5  
6  
7  
8  
9  
10  
11  
12  
13  
14  
15  
16  
17  
18  
19  
20  
21  
22  
23  
24  
25  
26  
27  
28  
29  
30  
31  
32  
33  
34  
35  
36  
37  
38  
39  
40  
41  
42  
43  
44  
45  
46  
47  
48  
49  
50  
51  
52  
53  
54  
55  
56  
57  
58  
59  
60

13. McIntosh IB, Swanson V, Power KG, Rae C: **General practitioners' and nurses' perceived roles, attitudes and stressors in the management of people with dementia.** *HEALTH BULLETIN-SCOTTISH OFFICE DEPARTMENT OF HEALTH* 1999, **57**:35-43.
14. Lahjibi-Paulet H, Alain AD, Minard A, Gaxatte C, Saint-Jean O, Somme D: **Attitudes towards Alzheimer's disease: A qualitative study of the role played by social representation on a convenient sample of French general practitioners.** *Aging Clinical and Experimental Research* 2012, **24**(4):384-390.
15. Somme D, Gautier A, Pin S, Corvol A: **General practitioner's clinical practices, difficulties and educational needs to manage Alzheimer's disease in France: analysis of national telephone-inquiry data.** *BMC family practice* 2013, **14**(1):81.
16. Gibbins J, McCoubrie R, Forbes K: **Why are newly qualified doctors unprepared to care for patients at the end of life?** *Medical education* 2011, **45**(4):389-399.
17. Bradford A, Kunik ME, Schulz P, Williams SP, Singh H: **Missed and delayed diagnosis of dementia in primary care: prevalence and contributing factors.** *Alzheimer disease and associated disorders* 2009, **23**(4):306.
18. Gerritsen DL, Oyeboode J, Gove D: **Ethical implications of the perception and portrayal of dementia.** *Dementia* 2016:1471301216654036.
19. Aminzadeh F, Molnar FJ, Dalziel WB, Ayotte D: **A review of barriers and enablers to diagnosis and management of persons with dementia in primary care.** *Canadian Geriatrics Journal* 2012, **15**(3):85.
20. Perry M, Draskovic I, van Achterberg T, van Eijken MIJ, Lucassen P, vernooij-Dassen MJFJ, Olde Rikkert MGM: **Development and validation of quality indicators for dementia diagnosis and management in a primary care setting.** *Journal of the American Geriatrics Society* 2010, **58**(3):557-563.
21. Ahmad S, Orrell M, Iliffe S, Gracie A: **GPs' attitudes, awareness, and practice regarding early diagnosis of dementia.** *Br J Gen Pract* 2010, **60**(578):e360-e365.
22. Hawkins RM: **Self-efficacy: a predictor but not a cause of behavior.** *Journal of behavior therapy and experimental psychiatry* 1992, **23**(4):251-256.
23. Kaduszkiewicz H, Bachmann C, van den Bussche H: **Telling "the truth" in dementia--do attitude and approach of general practitioners and specialists differ?** *Patient Educ Couns* 2008, **70**(2):220-226.
24. Yaffe MJ, Orzeck P, Barylak L: **Family physicians' perspectives on care of dementia patients and family caregivers.** *Canadian Family Physician* 2008, **54**(7):1008-1015.
25. Jennings AA, Foley T, Walsh KA, Coffey A, Browne JP, Bradley CP: **General practitioners' knowledge, attitudes, and experiences of managing behavioural and psychological symptoms of dementia: A mixed-methods systematic review.** *Int J Geriatr Psychiatry* 2018.
26. Meuser TM, Boise L, Morris JC: **Clinical benefits and practices in dementia care: Implications for health educators.** *Educational Gerontology* 2004, **30**:491-516.
27. Surr CA, Gates C, Irving D, Oyeboode J, Smith SJ, Parveen S, Drury M, Dennison A: **Effective Dementia Education and Training for the Health and Social Care Workforce: A Systematic Review of the Literature.** *Review of Educational Research* 2017, **87**(5):966-1002.
28. Thyrian JR, Hoffmann W: **Dementia care and general physicians-a survey on prevalence, means, attitudes and recommendations.** *Central European journal of public health* 2012, **20**(4):270.
29. Turner S, Iliffe S, Downs M, Wilcock J, Bryans M, Levin E, Keady J, O'Carroll R: **General practitioners' knowledge, confidence and attitudes in the diagnosis and management of dementia.** *Age and Ageing* 2004, **33**:461-467.
30. Iliffe S, Wilcock J, Austin T, Walters K, Rait G, Turner S, Bryans M, Downs M: **Dementia diagnosis and management in primary care developing and testing educational models.** *Dementia* 2002, **1**(1):11-23.

- 1  
2  
3 1 31. Foley T, Boyle S, Jennings A, Smithson WH: **“We’re certainly not in our comfort zone”**: a  
4 2 **qualitative study of GPs’ dementia-care educational needs**. *BMC family practice* 2017,  
5 3 **18(1):66**.  
6 4 32. Tullo E, Allan L: **What should we be teaching medical students about dementia?** *Int*  
7 5 *Psychogeriatr* 2011, **23**.  
8 6 33. Phillipson L, Magee C, Jones S, Reis S, Skaldzien E: **Dementia attitudes and help-seeking**  
9 7 **intentions: an investigation of responses to two scenarios of an experience of the early**  
10 8 **signs of dementia**. *Aging & mental health* 2015, **19(11):968-977**.  
11 9 34. Tierney L, Mason R, Doherty K, Winbolt M, Long M, Robinson A: **Workshops on diagnosis**  
12 10 **and management of dementia for general practitioners: a pre–post intervention study of**  
13 11 **dementia knowledge**. *BMJ open* 2019, **9(4):e027804**.  
14 12 35. Hansen EC, Hughes C, Routley G, Robinson AL: **General practitioners' experiences and**  
15 13 **understandings of diagnosing dementia: factors impacting on early diagnosis**. *Social*  
16 14 *science & medicine* 2008, **67(11):1776-1783**.  
17 15 36. George E, Engel L: **The clinical application of the biopsychosocial model**. *American journal*  
18 16 *of Psychiatry* 1980, **137(5):535-544**.  
19 17 37. Jackson JS, Antonucci TC, Brown E: **A cultural lens on biopsychosocial models of aging**.  
20 18 *Advances in cell aging and gerontology* 2003, **15:221-241**.  
21 19 38. Mason R, Doherty K, Eccleston C, Annear M, Lo A, Tierney L, Mclnerney F, Robinson A:  
22 20 **General practitioners attitude and confidence scale for dementia (GPACS-D): confirmatory**  
23 21 **factor analysis and comparative subscale scores among GPs and supervisors**. *BMC family*  
24 22 *practice* 2019, **20(1):6**.  
25 23 39. Bandura A: **Health promotion from the perspective of social cognitive theory**. *Psychology*  
26 24 *and health* 1998, **13(4):623-649**.  
27 25 40. Field A: **Discovering statistics using IBM SPSS statistics**: Sage; 2013.  
28 26 41. Tabachnick BG, Fidell LS, Osterlind SJ: **Using multivariate statistics**. 2001.  
29 27 42. Fritz CO, Morris PE, Richler JJ: **Effect size estimates: current use, calculations, and**  
30 28 **interpretation**. *Journal of experimental psychology: General* 2012, **141(1):2**.  
31 29 43. Australia GPS: **National GP Supevisor Survey**. 2017.  
32 30 44. Taylor R, Radloff A, Edwards E: **Australian general practice training program**. *National*  
33 31 *report on the* 2017.  
34 32 45. Magin P, Morgan S, Henderson K, Tapley A, McElduff P, Pearlman J, Goode S, Spike N,  
35 33 Laurence C, Scott J, Thompson A, van Driel, M: **Family medicine trainees’ clinical experience**  
36 34 **of chronic disease during training: a cross-sectional analysis from the registrars’ clinical**  
37 35 **encounters in training study**. *BMC medical education* 2014, **14(1):260**.  
38 36 46. Milne AJ, Hmailto-West K, Hatzidimitriadou E: **GP attitudes to early diagnosis of dementia:**  
39 37 **Evidence of improvement**. *Aging and Mental Health* 2005, **9(5):449-455**.  
40 38 47. Wearne S, Dornan T, Teunissen PW, Skinner T: **General practitioners as supervisors in**  
41 39 **postgraduate clinical education: an integrative review**. *Medical Education* 2012,  
42 40 **46(12):1161-1173**.  
43 41 48. Practitioners TRACoG: **Curriculum for Australian general practice: Users Guide 2018**.  
44 42 2018.  
45 43 49. McCall LM, Clarke DM, Rowley G: **Does a continuing medical education course in mental**  
46 44 **health change general practitioner knowledge, attitude and practice and patient**  
47 45 **outcomes**. *Primary Care Mental Health* 2004, **2(1):13-22**.  
48 46  
49 47  
50  
51  
52  
53  
54  
55  
56  
57  
58  
59  
60

1  
2  
3  
4  
5  
6  
7  
8  
9  
10  
11  
12  
13  
14  
15  
16  
17  
18  
19  
20  
21  
22  
23  
24  
25  
26  
27  
28  
29  
30  
31  
32  
33  
34  
35  
36  
37  
38  
39  
40  
41  
42  
43  
44  
45  
46  
47  
48  
49  
50  
51  
52  
53  
54  
55  
56  
57  
58  
59  
60

1

For peer review only
